1 **Coherent feedforward regulation of gene expression by *Caulobacter*  $\sigma^T$  and GsrN during**  
2 **hyperosmotic stress**

3

4

5 Matthew Z. Tien, Benjamin J. Stein, Sean Crosson\*

6

7

8 Department of Biochemistry and Molecular Biology, University of Chicago, Chicago, IL 60637. USA.

9

10

11 \* Corresponding Author

12 E-mail: [scrosson@uchicago.edu](mailto:scrosson@uchicago.edu)

13

14 **Running title:** *Caulobacter* regulatory response to hyperosmotic stress

15

16

## 17 **Abstract**

18 GsrN is a conserved small RNA that is under transcriptional control of the general stress sigma factor,  $\sigma^T$ ,  
19 and that functions as a post-transcriptional regulator of *Caulobacter crescentus* survival under multiple  
20 stress conditions. We have defined features of GsrN structure that determine survival under  
21 hyperosmotic stress, and have applied transcriptomic and proteomic methods to identify regulatory  
22 targets of GsrN under hyperosmotic conditions. The 5' end of GsrN, which includes a conserved  
23 cytosine-rich stem loop structure, is necessary for cell survival after osmotic upshock. GsrN both  
24 activates and represses gene expression in this stress condition. Expression of an uncharacterized open  
25 reading frame predicted to encode a glycine-zipper protein, *osrP*, is strongly activated by GsrN. Our data  
26 support a model in which GsrN physically interacts with *osrP* mRNA through its 5' C-rich stem loop to  
27 enhance OsrP protein expression. We conclude that *sigT*, *gsrN*, and *osrP* form a coherent feedforward  
28 loop in which  $\sigma^T$  activates *gsrN* and *osrP* transcription during stress, and GsrN activates OsrP protein  
29 expression at the post-transcriptional level. This study delineates transcriptional and post-transcriptional  
30 layers of *Caulobacter* gene expression control during hyperosmotic stress, uncovers a new regulatory  
31 target of GsrN, and defines a coherent feedforward motif in the *Caulobacter* GSR regulatory network.

32

## 33 **Importance**

34 Bacteria inhabit diverse niches, and must adapt their physiology to constant environmental fluctuations.  
35 A major response to environmental perturbation is to change gene expression. *Caulobacter* and other  
36 alphaproteobacteria initiate a complex gene expression program known as the general stress response  
37 (GSR) under conditions including oxidative stress, osmotic stress, and nutrient limitation. The GSR  
38 enables cell survival in these environments. Understanding how bacteria survive stress requires that we  
39 dissect gene expression responses, such as the GSR, at the molecular level. This study is significant as  
40 it defines transcriptional and post-transcriptional layers of gene expression regulation in response to  
41 hyperosmotic stress. We further provide evidence that coherent feedforward motifs influence the system  
42 properties of the *Caulobacter* GSR pathway.

## 43 Introduction

44 Cells alter gene expression to adapt to environmental perturbations. In bacteria, two major mechanisms  
45 controlling transcription are two-component signaling (TCS) (1) and alternative sigma ( $\sigma$ ) factor  
46 regulation (2, 3). In species of the class Alphaproteobacteria, crosstalk between these mechanisms is  
47 uniquely achieved via the protein, PhyR, which contains both a  $\sigma$ -like domain and a TCS receiver  
48 domain (4-7). Under a range of specific stress conditions, PhyR becomes phosphorylated and, through a  
49 protein partner switching mechanism (5), activates a gene expression program known as the general  
50 stress response (GSR). The GSR is required for survival under diverse environmental conditions (8, 9).

51

52 We recently developed a network-based algorithm (10) to interrogate publicly available gene expression  
53 datasets to predict genes functioning in stress survival in the alphaproteobacterium, *Caulobacter*  
54 *crenscentus*. This led to the discovery of a conserved small RNA (sRNA), GsrN, that plays an important  
55 role in survival across distinct environmental conditions including hyperosmotic and oxidative stress (11).  
56 GsrN is directly activated by the GSR alternative sigma factor,  $\sigma^T$ , and imposes a post-transcriptional  
57 layer of gene expression regulation during the general stress response. In the case of hydrogen peroxide  
58 stress, GsrN protects cells by base pairing with the 5' leader sequence of *katG* mRNA to promote  
59 expression of KatG, a catalase/peroxidase protein (11). To date, the identity of genes regulated by GsrN  
60 under hyperosmotic stress conditions remain undefined. The goal of this study was to define structural  
61 features of *Caulobacter* GsrN that are required for hyperosmotic stress survival and to identify direct  
62 molecular targets of GsrN under hyperosmotic conditions.

63

64 The induction of sRNA expression by osmotic stress has been described in a handful of bacterial species  
65 (12-15). Examples of sRNAs with known roles in osmoregulation of gene expression include OmrA/OmrB  
66 (16), MicF (12), and MicC (17) in *Escherichia coli*. The OmrA/OmrB system is upregulated during  
67 osmotic stress by the two-component system, EnvZ-OmpR. OmrA/OmrB function as post-transcriptional  
68 feedback repressors of OmpR (18) and repress the expression of outer membrane proteins, including  
69 TonB-dependent receptors (16). MicF and MicC are also induced by changes in osmolarity and function

70 to repress translation of outer membrane proteins OmpF and OmpC, respectively (12, 17). Though  
71 expression of these sRNAs are induced by shifts in the osmotic state of the environment, data  
72 demonstrating roles for OmrA/OmrB, MicC, and MicF in cell survival under acute osmotic stress have  
73 not, to our knowledge, been reported.

74

75 We have assayed hyperosmotic stress survival of a series of *Caulobacter gsrN* mutant strains, used  
76 transcriptomic and proteomic methods to more clearly define the role of GsrN in gene expression during  
77 hyperosmotic stress, and provided evidence for a new direct regulatory target of GsrN. Features of GsrN  
78 structure that are functionally important for hyperosmotic stress survival are contained in the 5' end of the  
79 molecule, and include a conserved cytosine-rich stem loop structure. Transcriptomic and proteomic  
80 analyses identified genes that are both activated and repressed by GsrN upon shift to a hyperosmotic  
81 environment. Among the regulated gene set was a hypothetical open reading frame we have named  
82 *osrP*, which encodes a glycine zipper domain resembling the glycine zipper motifs of large- and small-  
83 conductance mechanosensitive channels (19). We present evidence that GsrN directly interacts with  
84 *osrP* mRNA and activates OsrP protein expression at the post-transcriptional level to form a coherent  
85 feedforward regulatory loop with  $\sigma^T$ . This study advances understanding of *Caulobacter crescentus* gene  
86 expression during hyperosmotic stress and defines a new post-transcriptional regulatory target of GsrN.

87

## 88 **Results**

### 89 **A 5' cytosine-rich loop in GsrN is necessary for osmotic stress survival**

90 GsrN is a small RNA (sRNA) that undergoes endonucleolytic processing, and functions as a  
91 potent regulator of both oxidative stress and osmotic stress survival in *Caulobacter crescentus* (11).  
92 Expression of the processed 5' fragment of GsrN is necessary and sufficient to protect cells from  
93 hydrogen peroxide exposure. This protection requires interaction of GsrN with the mRNA of  
94 catalase/peroxidase *katG* through a C-rich loop located in the stable 5' half of GsrN (11). To assess the  
95 functional role of GsrN processing and the 5' C-rich loop under a distinct stress condition, we assayed  
96 osmotic stress survival of strains harboring truncated and C-loop mutant variants of GsrN.

97 For these assays, we generated: *i*) a GsrN deletion strain ( $\Delta gsrN$ ), and *ii*) a strain lacking the 5'  
98 end of GsrN,  $gsrN(\Delta 5')$  (by deleting *gsrN* nucleotides 10-50) (**Fig. 1A**). Both  $\Delta gsrN$  and  $gsrN(\Delta 5')$  had  $\approx 1$   
99 order of magnitude reduced viability during sucrose-induced osmotic stress when compared to wild-type  
100 *Caulobacter* strain CB15 (**Fig. 1B**). Ectopic expression of the first 58 nucleotides of *gsrN* in single copy  
101 from its native promoter ( $gsrN(\Delta 3')$ ) complemented the survival defect of  $\Delta gsrN$ . Notably, a  $\Delta gsrN$  strain  
102 harboring multiple integrations of this complementation plasmid,  $\Delta gsrN::gsrN(\Delta 3')^{++}$ , had increased  
103 viability under hyperosmotic stress compared to wild type (**Fig. 1B**). This protective effect is consistent  
104 with peroxide stress protection conferred by full-length *gsrN* overexpression ( $gsrN^{++}$ ), reported in our  
105 previous study (11).

106 Considering expression of the 5' end of GsrN complemented the hyperosmotic stress survival  
107 defect of  $\Delta gsrN$ , we hypothesized that the 5' C-rich loop functions to mitigate osmotic stress in addition to  
108 its previously reported function in peroxide stress mitigation. Overexpression of a GsrN mutant variant in  
109 which the 5' cytosine tract was replaced with guanosines,  $gsrN(RS)$ , failed to restore osmotic stress  
110 survival to wild-type levels in the  $\Delta gsrN$  strain (**Fig. 1C**). We thus propose that the 5' C-loop of GsrN is  
111 necessary to target mRNAs that are involved in osmotic stress survival.

### 112 113 ***gsrN*-dependent osmotic stress protection requires *sigT***

114 *gsrN* expression is directly activated by the general stress sigma factor, SigT ( $\sigma^T$ ). As described above,  
115 strains lacking *sigT* (6, 20) or *gsrN* (11) are more susceptible to hyperosmotic stress. We thus tested  
116 whether expression of *gsrN* is sufficient to rescue the osmotic stress survival defect of the  $\Delta sigT$  strain,  
117 as previously reported for hydrogen peroxide stress (11). We constructed a  $\Delta sigT$  strain in which *gsrN*  
118 transcription was driven by the primary sigma factor RpoD ( $\sigma^{70}$ ). We call this expression system P1-*gsrN*  
119 (**Fig. 2A**). Expression of GsrN from P1 resulted in comparable steady-state levels to GsrN expressed  
120 from its native  $\sigma^T$ -dependent promoter (**Fig. 2B**), but did not rescue the hyperosmotic stress survival  
121 defect of  $\Delta sigT$  (**Fig. 2C**). Unlike acute peroxide stress, which does not induce expression of *gsrN*,  
122 osmotic stress induces the *gsrN* transcription by a factor of three (11). To better emulate GsrN  
123 expression during osmotic stress, we created a strain bearing three copies of P1-*gsrN*. Using this 3(P1-

124 *gsrN*) strain, we matched the enhanced steady-state levels of GsrN observed during osmotic stress (**Fig.**  
125 **2B**). However, enhanced expression of GsrN in  $\Delta sigT+3(P1-gsrN)$  still failed to rescue the hyperosmotic  
126 stress survival defect of the  $\Delta sigT$  strain (**Fig. 2C**). We conclude that GsrN-dependent protection during  
127 hyperosmotic stress requires other genes in the  $\sigma^T$ -regulon.

128

### 129 **Defining *sigT* and *gsrN* regulated genes under hyperosmotic conditions**

130 We considered two non-mutually exclusive models to explain why GsrN-dependent protection  
131 against hyperosmotic stress requires  $\sigma^T$ : *i*) GsrN functions as a direct post-transcriptional regulator of  
132 mRNAs that are transcribed by  $\sigma^T$ , *ii*) GsrN regulates gene products that are not under the control of  $\sigma^T$ ,  
133 but that require  $\sigma^T$ -regulated genes to mitigate hyperosmotic stress. Thus, to identify candidate mRNA  
134 targets and begin gathering evidence to support either (or both) models, we measured gene expression  
135 during hyperosmotic stress in a GsrN overexpression strain (*gsrN<sup>++</sup>*), a  $\Delta sigT$  strain, and in wild type  
136 *Caulobacter*. Specifically, we measured steady-state transcript levels in  $\Delta sigT$  and wild type strains  
137 under stressed and untreated conditions to define the  $\sigma^T$ -dependent osmotic stress regulon. We further  
138 measured transcripts in *gsrN<sup>++</sup>* and wild type under the same conditions to identify candidate transcripts  
139 involved in *gsrN*-dependent hyperosmotic stress protection. Lastly, we measured proteome changes  
140 between treated and untreated *gsrN<sup>++</sup>* and wild-type strains to define protein expression regulated by  
141 GsrN during osmotic stress.

142 Although *sigT*-dependent gene expression has been previously studied in *Caulobacter* using  
143 microarray technologies (7, 20, 21), a high-resolution RNA-seq analysis of GSR mutant strains under  
144 hyperosmotic stress has not been published. Our RNA-seq measurements defined a  $\sigma^T$ -regulon  
145 comprising 333 genes that are differentially expressed between  $\Delta sigT$  and wild type under untreated  
146 conditions (false-discovery rate (FDR) *p-value*  $\leq 0.05$ ; absolute fold change  $\geq 1.5$ ). The number of  
147 differentially regulated genes during hyperosmotic stress is greater – 530 genes – using the same cutoff  
148 criteria. We defined the core  $\sigma^T$ -regulon as the intersection of differentially regulated genes in both  
149 untreated and treated conditions, 220 genes (**Table S3**). This expands the number of  $\sigma^T$ -regulated genes  
150 compared to previous reports by our group (20) and others (21). We further sought to predict genes in

151 the  $\sigma^T$  regulon that are directly transcribed by  $\sigma^T$ . To this end, we extracted 250 nucleotide windows  
152 upstream of the translation start sites of genes activated by *sigT*. In the case of operons, we only  
153 considered the upstream region of the leading gene. We then created a degenerate  $\sigma^T$  motif based on  
154 variations in 20 previously identified  $\sigma^T$ -binding sites (**Fig. S2**) (7, 20, 21). We searched for this motif in  
155 the regions upstream of *sigT*-activated genes and identified 32 additional transcripts with candidate  $\sigma^T$ -  
156 binding sites (**see Table S3**).

157 A parallel RNA-Seq experiment identified 35 genes that are differentially expressed in *gsrN*<sup>++</sup>  
158 relative to wild type in untreated conditions and 141 genes under hyperosmotic conditions (false-  
159 discovery rate (FDR) *p-value*  $\leq 0.05$ ; absolute fold change  $\geq 2.0$ ) (**see Table S4**). Considering that  
160 differences in GsrN-regulated transcripts do not necessarily correspond to differences in protein levels  
161 (11), and that GsrN is known to regulate gene expression at the post-transcriptional level, we performed  
162 a LC-MS/MS analysis of total soluble protein isolated from *gsrN*<sup>++</sup> and wild type strains under untreated  
163 and hyperosmotic conditions. Twenty-two proteins showed significant differences in steady-state levels  
164 between *gsrN*<sup>++</sup> and wild type under untreated conditions (false-discovery rate (FDR) *p-value*  $\leq 0.05$ ;  
165 absolute fold change  $\geq 2.0$ ). None of these proteins showed significant transcript level differences under  
166 the same criteria, and in all cases protein levels were lower in *gsrN*<sup>++</sup> strains compared to wild type in  
167 untreated conditions (**Table 1**). This provides evidence that the predominant role for *gsrN* in  
168 exponentially-growing cells is a repressor. Under hyperosmotic stress nine proteins had significant  
169 differences in steady-state levels between *gsrN*<sup>++</sup> and wild type (**Table 2**). Four of these proteins had  
170 corresponding significant differences in transcript levels; one protein had an inverse relationship with its  
171 transcript levels (**Fig. 3**). This analysis identified proteins for which expression is activated by GsrN under  
172 hyperosmotic stress and proteins for which expression is repressed by GsrN under hyperosmotic stress.

173

#### 174 **Comparative RNA-seq analysis uncovers candidate targets of GsrN under hyperosmotic stress**

175 To delineate the roles of *sigT* and *gsrN* in stress survival, we compared genes that are  
176 differentially regulated between  $\Delta sigT$ , *gsrN*<sup>++</sup> and wild type strains subjected to hyperosmotic stress.  
177 More explicitly, we sought to test the model that GsrN functions as a direct post-transcriptional regulator

178 of mRNAs that are dependent on  $\sigma^T$ -transcription. Since transcription of *gsrN* is directly activated by  $\sigma^T$ ,  
179 we expected (in this model) that the set of transcripts modulated by *gsrN* overexpression should exhibit  
180 some overlap with the set of transcripts that changes upon *sigT* deletion. Indeed, we observed 20 genes  
181 with congruent patterns of regulation in these two datasets (**Fig. 4A and Table 3**).

182 In this set of 20 genes, we identified six candidate GsrN target genes whose transcript levels  
183 were significantly lower in  $\Delta sigT$  and higher in *gsrN<sup>++</sup>* under hyperosmotic stress (**Fig. 4B**). We predicted  
184 strong  $\sigma^T$ -binding sites in the promoters of five of these candidates: *CCNA\_00882*, *CCNA\_00709*,  
185 *CCNA\_03889*, and *CCNA\_03694-CCNA\_03595* (**Table S1**). Of these candidate direct regulatory targets  
186 of GsrN, *CCNA\_00882* showed the highest change ( $\approx 7$  fold) upon overexpression of *gsrN* (**Fig. 4B**).  
187 Moreover, steady-state *CCNA\_00882* transcript levels were significantly higher during osmotic stress in  
188 wild type cultures ( $\approx 6$  fold) and in GsrN overexpression (*gsrN<sup>++</sup>*) cultures ( $\approx 12.5$  fold). Thus, we named  
189 *CCNA\_00882*, *osrP*, osmotic stress regulated protein. We note that *osrP* mRNA was previously identified  
190 as an RNA that co-elutes with GsrN in an affinity pull-down experiment (11). Considering the presence of  
191 a  $\sigma^T$ -binding motif in the *osrP* promoter, its regulation by GsrN in our transcriptomic datasets, and the fact  
192 that it co-purifies with GsrN, we postulated that *osrP* is a direct target of GsrN.

193

194 ***osrP* is regulated by  $\sigma^T$ , induced under hyperosmotic stress, and interacts with GsrN via its 5'**  
195 **leader sequence**

196 *osrP* is annotated as a 332-residue hypothetical protein that is largely restricted to the genus  
197 *Caulobacter*, based on a BLAST search (22) of the GenBank non-redundant database. However, the  
198 primary structure of *osrP* shares some features with annotated open reading frames across genera in the  
199 family Caulobacteraceae including *Phenylobacterium*, *Asticcacaulis*, and *Brevundimonas*. OsrP contains  
200 a signal peptide at its amino terminus with a Type I signal peptidase cleavage site, as predicted by  
201 SignalP (23). A conserved glycine zipper motif (Pfam05433) comprised of two hydrophobic helices is  
202 located between residues 224 and 268. Based on these sequence features, we predict that OsrP is a  
203 periplasmic protein (**Fig. S3**).



204 To better understand the regulation of *osrP* by  $\sigma^T$  and GsrN, we identified its transcription start  
205 site (TSS) by 5' rapid amplification of cDNA ends (5' RACE). We mapped the *osrP* TSS to nucleotide  
206 962935 in the *C. crescentus* genome (Genbank accession NC\_011916); a near-consensus  $\sigma^T$  binding  
207 site is positioned at -35 and -10 relative to the *osrP* TSS (**Fig. 5A and Table S1**). To assess  
208 transcriptional regulation of *osrP*, we generated a fusion of the *osrP* promoter to a promoterless *lacZ* (**Fig.**  
209 **5B**).  $\beta$ -galactosidase activities in wild-type and  $\Delta$ *gsrN* strains harboring this reporter plasmid were  
210 comparable under untreated conditions, and transcription was activated in both of these genetic  
211 backgrounds upon addition of 150 mM sucrose to induce hyperosmotic stress. In a  $\Delta$ *sigT* strain, we  
212 observed basal  $\beta$ -galactosidase activity in untreated conditions, and activity was not induced upon  
213 addition of 150 mM sucrose (**Fig. 5B**). We conclude that transcription of *osrP* depends on *sigT* and is  
214 independent of *gsrN*.

215 We previously affinity purified GsrN tagged with a PP7 RNA hairpin aptamer (GsrN(37)::PP7hp)  
216 from *Caulobacter* cell lysate, and quantified RNAs that co-purified with GsrN by RNA-seq (11). For this  
217 present study, we have re-analyzed our published dataset (NCBI GEO accession number GSE106171)  
218 with the goal of identifying reads that map to *osrP* mRNA. We observed significant enrichment of reads  
219 that map to the extended 5' leader sequence of *osrP*, which is comprised of approximately 80  
220 nucleotides between the TSS and the annotated start codon. No enrichment of the *osrP* leader is  
221 observed with the PP7hp::GsrN-3' negative control (**Fig. 5C**). IntaRNA analysis (24) of this co-purifying  
222 region predicted strong base-pairing between the 5' C-rich loop of GsrN and the 5' leader of *osrP* (**Fig.**  
223 **5A**). From these data, we conclude that GsrN interacts with the 5' untranslated leader of *osrP* mRNA.

224

### 225 **GsrN activates OsrP expression at the post-transcriptional level**

226 To test the functional significance of the proposed GsrN binding site in the 5' leader of *osrP*  
227 mRNA, we constructed an *osrP* transcriptional-translational (TT) reporter plasmid. The reporter contains  
228 the *osrP* promoter, the 5' untranslated region (5' UTR), and the first 7 codons of *osrP* fused to 5' end of  
229 *lacZ* lacking a start codon (**Fig. 6A**). The RNA-fold (25) structure of the 5' UTR and the nucleotides  
230 encoding the first 7 amino acids of *osrP* predicts that the majority of the GsrN-binding site is sequestered

231 in a base-paired region (26) (**Fig. 6B**). Under unstressed conditions, activity from the TT reporter is low in  
232 wild-type cells, but reduced by 2 fold in  $\Delta sigT$  and  $\Delta gsrN$  backgrounds. Overexpression of *gsrN* (*gsrN<sup>++</sup>*)  
233 enhances expression 8 fold compared to wild type. This enhancement of *osrP* expression requires *sigT*,  
234 as overexpression of *gsrN* from the  $\sigma^{70}$  P1 promoter in a  $\Delta sigT$  background does not induce expression  
235 from the *osrP* TT reporter (**Fig. 6C**). This result is consistent with data presented in **Fig. 5B** showing the  
236 *osrP* transcription requires  $\sigma^T$  and supports a model in which GsrN regulates OsrP protein expression at  
237 the post-transcriptional level. Lastly, our measurements of *osrP* TT reporter activity under hyperosmotic  
238 stress conditions showed similar relative regulatory trends across the assayed genetic backgrounds,  
239 though baseline expression is higher (**Fig. 6C**).

240 To directly measure OsrP protein levels, we inserted a C-terminal FLAG tag at the native *osrP*  
241 locus on the *Caulobacter* chromosome. OsrP::FLAG is expressed at low levels in exponentially growing  
242 wild type cultures, and was difficult to detect by Western blot. Steady-state levels of OsrP::FLAG were  
243 higher in cultures overexpressing GsrN (*gsrN<sup>++</sup>*) (**Fig. 6D**). Hyperosmotic stress (150 mM sucrose)  
244 induced production of OsrP::FLAG in wild-type cells. OsrP::FLAG detection required *gsrN*: there was no  
245 detectable OsrP::FLAG in  $\Delta gsrN$  cells. Consistent with our *osrP* reporter data, we observed a large  
246 increase in OsrP::FLAG levels in *gsrN<sup>++</sup>* relative to wild type during hyperosmotic stress (**Fig. 6D**). Again,  
247 these data support a model in which GsrN post-transcriptionally activates OsrP protein expression.

248

#### 249 **Assessing the role of the GsrN C-rich recognition loop in activation of OsrP expression**

250 It is established that the C-rich target recognition loop is a functionally-important feature of GsrN  
251 structure that directly activates KatG catalase/peroxidase expression through a base-pairing interaction  
252 with the 5' leader of *katG* mRNA (11). To test the role of this recognition loop in the activation of OsrP  
253 protein expression, we constructed a TT *osrP* reporter containing reverse-swapped (RS) mutations in the  
254 5' leader of *osrP* (*osrP*-RS1). These mutations were expected to disrupt predicted base-pairing  
255 interactions with wild-type GsrN and restore base pairing interactions with the complementary GsrN(RS)  
256 recognition loop mutant (see **Fig. S4**).

257 It is important to note that the RS1 mutations disrupt predicted secondary structure (**Fig. S4A**)  
258 and calculated stability of the *osrP* leader (mFold -46.6 kcal/mol for wild-type compared to -39.8 kcal/mol  
259 for *osrP*-RS1 (26)). The *osrP*-RS1 reporter had substantially higher basal reporter activity than the wild-  
260 type *osrP* TT reporter (Fig. S4B and S4F). Thus the RS1 mutations alone disrupt the *osrP* leader  
261 structure and regulation of OsrP expression, making it difficult to infer a regulatory role for base pairing  
262 with GsrN. Deletion of *gsrN* had no effect on *osrP*-RS1 activity, as expected if base pairing is disrupted  
263 by the RS1 mutations. However, overexpression of *gsrN* unexpectedly activated expression from the  
264 *osrP*-RS1 reporter (**Fig. S4B**). In the opposite experiment, in which we engineered complementary RS  
265 mutations into the GsrN recognition loop, the activity from the wild-type *osrP* TT reporter was diminished  
266 (**Fig. S4C**). In the case of direct base pairing, we would expect RS reporter activity to be restored when  
267 complementary RS mutations are present in both GsrN and the *osrP* leader. However, the high basal  
268 activity of *osrP*-RS1 in the strain bearing both these mutations poses challenges in interpretation of these  
269 data.

270 Because the RS1 mutations disrupt structure, stability and regulation of the *osrP* leader, we  
271 sought to compensate for base pairing disruptions arising in *osrP*-RS1 by introducing compensatory  
272 base changes on the opposing arm of the RNA stem in the *osrP* leader. These mutations were predicted  
273 to restore the secondary structure and the stability of the leader; we termed this the *osrP*-RS2 reporter  
274 (**Fig. S4D**). We failed to detect any activity from the *osrP*-RS2 reporter in any strain, including those  
275 expressing *gsrN*(RS) (**see Fig. S4E-F**). The lack of activity could be due to the lower levels of GsrN(RS)  
276 versus wild-type GsrN (11) or it may be the case that the RS2 mutations ablate an essential regulatory  
277 feature of the *osrP* leader. Based on these reporter data, we conclude that mutation of the predicted  
278 GsrN target site in the 5' leader of *osrP* derepresses expression of this protein. From these experiments,  
279 we are not able to define the base pairing interaction between the GsrN C-rich loop and the 5' leader of  
280 *osrP* mRNA that activates OsrP expression.

281

282

283

## 284 ***osrP* does not affect hyperosmotic stress survival**

285 As *osrP* expression is under strong positive control of  $\sigma^T$  and GsrN during hyperosmotic stress,  
286 we tested the possibility that *osrP* contributes to stress survival. Deletion of *osrP* ( $\Delta osrP$ ) did not affect  
287 survival of *C. crescentus* under hyperosmotic conditions (**Fig. S1D**). Expression of *osrP* from a xylose-  
288 inducible expression plasmid (*osrP*<sup>+</sup>) also had no effect on hyperosmotic stress survival (**Fig. S1D**). We  
289 further tested the role of *osrP* on osmotic stress survival in  $\Delta gsrN$  and *gsrN*<sup>+</sup> backgrounds. *osrP* is not  
290 required for the protective effect conferred by *gsrN*<sup>+</sup> (see  $\Delta osrP$  *gsrN*<sup>+</sup> in **Fig. S1D**) and overexpression  
291 of *osrP* does not rescue strains lacking *gsrN* (see  $\Delta gsrN$  *osrP*<sup>+</sup> in **Fig. S1D**). From these data, we  
292 conclude that *osrP* is not the sole contributor to hyperosmotic stress survival under the assayed  
293 conditions.

294

## 295 **Discussion**

296 Microbes employ regulatory systems that function to mitigate the effects of osmotic stress (27).  
297 The freshwater oligotroph *Caulobacter crescentus* activates the general stress response (GSR) sigma  
298 factor,  $\sigma^T$ , during hyperosmotic stress. This, in turn, activates transcription of a large set of genes (**Table**  
299 **S3**) including the sRNA, GsrN (11, 21). Deleting either *sigT* or *gsrN* results in reduced viability under  
300 sucrose-induced hyperosmotic stress (**Fig.1C** and **Fig. 2C**). Unlike oxidative stress, in which *gsrN*  
301 expression alone is sufficient to protect cells (11), *gsrN*-dependent protection of *Caulobacter* during  
302 hyperosmotic stress requires that the *sigT* gene remain intact (**Fig. 2C**).

303 Transcriptomic analysis of a  $\Delta sigT$  strain provided a comprehensive view of the  $\sigma^T$  hyperosmotic  
304 stress regulon, while transcriptomic and proteomic analysis of a *gsrN* overexpression strain (*gsrN*<sup>+</sup>)  
305 revealed a set of transcripts and proteins that are under post-transcriptional control of GsrN during  
306 hyperosmotic stress (**Fig. 3** and **Table 2**). Comparative analyses of these datasets provided evidence for  
307 multi-output feedforward loops (FFL) involving  $\sigma^T$  and GsrN. One such coherent FFL involves the  
308 uncharacterized glycine-zipper protein, OsrP. Specifically, transcription of *osrP* is activated by  $\sigma^T$  (**Fig.**  
309 **5B**), likely via direct binding to the canonical  $\sigma^T$  binding site in its promoter (**Fig. 5A** and **Table S3**). OsrP  
310 protein expression is activated at the post-transcriptional level by GsrN (**Fig. 6C-D**), to form a coherent

311 FFL. Both *sigT* and *gsrN* are required for OsrP protein expression; thus, both regulators comprise an  
312 AND gate that regulates *osrP* expression.

313

### 314 **A coherent feedforward loop controls a *Caulobacter* gene expression response during** 315 **hyperosmotic stress**

316 Feedforward loops (FFL) are common regulatory motifs in microbial gene expression networks. In  
317 their simplest form, FFLs are comprised of three genetic components: two regulators and an output gene.  
318 The primary regulator functions to activate both the secondary regulator and the output gene; the  
319 secondary regulator functions to activate expression of the output gene (28). In the case of *osrP*,  $\sigma^T$  is  
320 the primary regulator that activates *osrP* and *gsrN* transcription; GsrN interacts with *osrP* mRNA to  
321 activate OsrP protein expression at the post-transcriptional level (**Fig. 7**).

322 There are several examples of sRNAs that are part of FFL motifs in bacteria (29-31). Activation of  
323 *osrP* expression by  $\sigma^T$  and GsrN in *Caulobacter* is perhaps most similar to the regulation of *ricI* by  $\sigma^S$  and  
324 the sRNA RprA in *Salmonella* (30); RicI functions as an inhibitor of plasmid transfer. In this instance, the  
325 primary and secondary regulators are swapped: RprA acts as a primary activator of *rpoS* and *ricI*  
326 expression. RprA itself is activated by the Rcs system (32), which responds to envelope stress. However,  
327 *rpoS* expression is controlled by multiple environmental signals and does not require *rprA* to transcribe  
328 *ricI*. Thus, *ricI* can be transcribed in the absence of envelope stress, but both RprA and  $\sigma^S$  are required  
329 for RicI protein expression. Thus, RprA and  $\sigma^S$  function as a FFL AND gate that ensures RicI expression  
330 only occurs upon Rcs activation by envelope damage.

331 Unlike *ricI*, the coherent FFL controlling *osrP* is activated by  $\sigma^T$  alone. In wild-type *C. crescentus*,  
332 we observe basal  $\sigma^T$ -dependent gene expression in the absence of any apparent stress (**Fig. 5B and**  
333 **Fig 6C**). During hyperosmotic stress, *osrP* expression measured from the *osrP i*) transcription and *ii*)  
334 transcription plus translation (TT) reporters are incongruent: *osrP* transcription increases 2-fold during  
335 hyperosmotic stress while TT reporter activity increases 6-fold within an equivalent time window. The  
336 difference in fold change between the two reporters is likely due to the positive regulatory effects of GsrN,  
337 the levels of which increase 3-fold during hyperosmotic stress (11).

338 During persistent stress conditions, such as hyperosmotic stress and stationary phase, we have  
339 observed that the stable 5' isoform of GsrN accumulates to higher levels than full-length GsrN (11).  
340 Accumulation of the 5' GsrN isoform could act as signal within the *sigT*-regulon to mount a specific  
341 response to persistent stress, such as hyperosmotic shock. This model is consistent with AND-type  
342 coherent FFLs, which result in delayed activation of the output gene. Expression delay arises from the  
343 lag between the production of the secondary regulator and the threshold necessary for the secondary  
344 regulator to act upon the output gene (28). In the case of *osrP*, levels of GsrN may set the threshold for  
345 OsrP protein production. Accumulation of the 5' GsrN isoform through prolonged  $\sigma^T$ -activity could amplify  
346 the expression of *osrP* over other  $\sigma^T$ -regulated genes in particular stress regimes. Although we  
347 conclusively demonstrate only one GSR coherent feedforward loop (during hyperosmotic stress) in this  
348 study, our transcriptomic and proteomic data show that several genes in the GSR regulon may be  
349 subject to similar regulation.

350

### 351 **Functional analysis of the uncharacterized glycine zipper protein, OsrP**

352 Bioinformatic analysis of OsrP predicts two notable features in its sequence: a signal peptide at  
353 its amino terminus with a Type I signal peptidase cleavage site and a conserved glycine zipper motif  
354 (Pfam05433) (**Fig. S3**). From this analysis, we predict that OsrP is in the periplasm of *C. crescentus*. The  
355 primary structure of the glycine zipper motif suggests a possible interaction with the cell membrane.  
356 Extended glycine zipper motifs can oligomerize and form pores within membranes (19). One notable  
357 example is the secreted *VacA* toxin of *H. pylori* that forms a hexameric anion selective channel in host  
358 cells (33).

359 In considering its primary structure, predicted localization, and regulation, it seemed possible that  
360 *osrP* could help alleviate osmotic stress in *C. crescentus*. However, deletion of *osrP* did not result in any  
361 obvious viability defect during sucrose-induced hyperosmotic stress. There are several genes co-  
362 regulated by  $\sigma^T$  and GsrN, and it may be the case that additional genes are required to mitigate the  
363 hyperosmotic stress conditions that we have tested. Prolonged exposure to other osmotic stresses

364 and/or different concentrations of osmolytes – including a range of ions – could provide insight into  
365 function of *osrP* activation by the GSR.

366 In a recent study of a diverse set of bacterial species, including *C. crescentus*, growth of  
367 transposon mutant libraries was characterized under multiple environmental conditions (34). In *C.*  
368 *crescentus*, *osrP* disruption resulted in a consistent disadvantage in growth in the presence of sodium  
369 perchlorate (fitness = -1.3, t score = -7.2). Sodium perchlorate is an anionic oxidizing agent. It remains  
370 uncertain how the oxidative, osmotic (or other) effects of sodium perchlorate in the medium affect fitness  
371 of strains harboring transposon disruptions of *osrP*, but this result provides an additional assay condition  
372 for future functional studies of *osrP*. Considering this sodium perchlorate result, we assayed survival of  
373 the *osrP* deletion strain under peroxide stress. The *osrP* deletion strain had no survival defect in the face  
374 of 200  $\mu$ M hydrogen peroxide exposure for 1 hour, while a *sigT* deletion strain had an expected ~2-3 log  
375 defect as previously reported (11). Studies to uncover conditions under which an *osrP* mutant has a  
376 growth or survival phenotype is ongoing.

377

### 378 **On additional GsrN regulatory targets**

379 Proteomic analysis of the *gsrN*<sup>++</sup> strain showed different sets of regulated genes between  
380 untreated and hyperosmotic stress conditions. In untreated cultures of *gsrN*<sup>++</sup>, all proteins with significant  
381 differential expression were under negative control of GsrN; there was no overlap with the differentially  
382 expressed proteins we observed in stress-treated cultures. Although GsrN may not directly control  
383 expression of all differentially regulated proteins in this dataset, the effect we observe upon *gsrN*  
384 overexpression in the absence of stress points to a role for GsrN during normal growth (**Table 1**).  
385 Notably, the cell-cycle phosphotransferase, ChpT, is significantly downregulated upon *gsrN*  
386 overexpression. ChpT is an essential protein is required for phosphorylation of the essential cell cycle  
387 master regulator, CtrA (35). Given the established connection between levels of CtrA and  $\sigma^T$  during  
388 nutrient limitation (36), it is conceivable that GsrN regulates the core cell cycle control system of *C.*  
389 *crescentus* under certain conditions.



390 Under hyperosmotic conditions, we observed only a few cases of proteins that differ significantly  
391 in steady-state levels between the *gsrN*<sup>++</sup> and wild type strains. Besides *osrP*, genes regulated by GsrN  
392 during hyperosmotic stress identified in this study were not identified in our previous study of mRNAs that  
393 co-purify with GsrN-PP7 (11). However, affinity-purification of GsrN-PP7 and its co-eluting RNAs was  
394 performed in unstressed conditions. Identification of co-eluting mRNAs using the PP7 aptamer pull-down  
395 approach is biased toward highly expressed RNAs; *osrP* mRNA was the highest expressed target during  
396 hyperosmotic stress (Figure 4). Future pull-down experiments conducted under a variety of stress  
397 conditions may define new GsrN mRNA targets that were missed due to low steady-state levels under  
398 non-inducing conditions.

399 Among the proteins negatively regulated by GsrN are three TonB-dependent receptors of  
400 unknown function (*CCNA\_00028*, *CCNA\_00214*, and *CCNA\_3023*) and a predicted efflux complex  
401 (*CCNA\_02172-74*) (**Tables 2 and 3**). GsrN may therefore have a functional role that is similar to the  
402 sRNAs, MicA and RybB, which are transcribed during envelope stress by  $\sigma^E$  in *E. coli* and repress outer  
403 membrane proteins (OMP) to mitigate accumulation of unfolded OMPs (37). Genes activated at the  
404 transcript level by GsrN during hyperosmotic stress include several with predicted  $\sigma^T$ -binding sites in their  
405 promoters (*CCNA\_00709*, *CCNA\_03889*, and *CCNA\_03694-CCNA\_03595*). These may provide  
406 additional cases of coherent FFLs. As discussed previously, expression of these genes may be sensitive  
407 to GsrN accumulation during prolonged stress. *CCNA\_00709* – a predicted small, two-pass membrane  
408 protein – and *CCNA\_03694* – a transcription factor – are attractive targets to investigate in future studies  
409 on the mechanism by which GsrN determines cell survival during hyperosmotic stress.

410

## 411 **Materials and Methods**

412 All *C. crescentus* experiments were conducted using strain CB15 (38) and derivatives thereof.

413

414 **Growth of *E. coli* and *C. crescentus*.** *C. crescentus* was cultivated on peptone-yeast extract (PYE)-  
415 agar (0.2% peptone, 0.1% yeast extract, 1.5% agar, 1 mM MgSO<sub>4</sub>, 0.5 mM CaCl<sub>2</sub>) (39) at 30°C.  
416 Antibiotics were used at the following concentrations on this solid medium: kanamycin 25 µg/ml,



417 tetracycline 2 µg/ml, nalidixic acid 20 µg/ml, and chloramphenicol 2 µg/ml. For liquid culture, *C.*  
418 *crenscentus* was cultivated in either PYE or in M2X defined medium (39). PYE liquid: 0.2%(w/v) peptone,  
419 0.1%(w/v) yeast extract, 1 mM MgSO<sub>4</sub>, and 0.5 mM CaCl<sub>2</sub>, autoclaved before use. M2X defined medium:  
420 0.15% (w/v) xylose, 0.5 mM CaCl<sub>2</sub>, 0.5 mM MgSO<sub>4</sub>, 0.01 mM Fe Chelate, and 1x M2 salts, filtered with a  
421 0.22 micron bottle top filter. One liter of 20x M2 stock was prepared by mixing 17.4 g Na<sub>2</sub>HPO<sub>4</sub>, 10.6  
422 KH<sub>2</sub>PO<sub>4</sub>, and 10 g NH<sub>4</sub>Cl. Antibiotics were used at the following concentrations in liquid medium:  
423 kanamycin 5 µg/ml, tetracycline 1 µg/ml, and chloramphenicol 2 µg/ml. For cultivation of *E. coli* in liquid  
424 medium, we used lysogeny broth (LB). Antibiotics were used at the following concentrations: kanamycin  
425 50 µg/ml, tetracycline 12 µg/ml, and chloramphenicol 20 µg/ml.

426

427 **Plasmid transformation into *C. crescentus*.** Plasmids were conjugated into CB15 (39) using the *E. coli*  
428 helper strain FC3 (40)(see Table S1). Conjugations were performed by mixing the donor *E. coli* strain,  
429 FC3, and the CB15 recipient strain in a 1:1:5 ratio. Mixed cells were pelleted for 2 min at 15,000xg,  
430 resuspended in 100 µL, and spotted on a nonselective PYE-agar plate for 12–24 hr. Exconjugants  
431 containing the desired plasmid were selected on PYE agar containing the plasmid-specified antibiotic for  
432 selection and nalidixic acid (20 µg/ml) to counter-select against both *E. coli* strains (helper and plasmid  
433 donor). Plasmids pMT552 and pMT680 integrate into the *vanA* and *xyiX* locus respectively. pMT680  
434 carries a chloramphenicol resistance marker gene (*cat*) and pMT552 carries a kanamycin resistance  
435 marker gene (*npt1*) (41). pNPTS138 integration occurs at a chromosomal site homologous to the  
436 insertion sequence.

437

438 **Chromosomal deletion and allele replacement in *C. crescentus*.** To generate the in-frame deletion  
439 and C-terminal FLAG-tagged *osrP* (*CCNA\_00882*) alleles ( $\Delta osrP$  and *osrP::FLAG*, respectively), we  
440 implemented a double crossover recombination strategy using the pNPTS138 plasmid (42, 43). Briefly,  
441 an in-frame deletion allele of *osrP* was generated using primers listed in Table S2 in the supplemental  
442 material and combined using splice-overlap-extension. The deletion allele carries a 5' (UP) and 3'  
443 (DOWN) flanking sequences of *osrP* and was ligated in the multiple cloning site (MCS) of a digested

444 pNPTS138 using the restriction enzymes HindIII and SpeI. The tagged allele *osrP::FLAG* was generated  
445 using three pieces, two with primers and one with a gene block (Gblock) listed in **Table S2**. The tagged  
446 allele was cloned into HindIII and SpeI digested pNPTS138 using Gibson assembly of all three pieces.  
447 The first recombination was achieved using a tri-parental mating described in the “Plasmid integration in  
448 *C. crescentus*” section with the plasmid-specified antibiotic, kanamycin (5 µg/ml). Single colony  
449 exconjugants were inoculated into liquid PYE for 6–16 hours in a rolling 30°C incubator for non-selective  
450 growth. Nonselective liquid growth allows for the second recombination event to occur, which either  
451 restores the native locus or replaces the native locus with the pNPTS138 insertion sequence. Counter-  
452 selection for the second recombination of pNPTS138 was carried out on PYE agar with 3% (w/v) sucrose.  
453 This selects for loss of the *sacB* gene during the second recombination event. Colonies were subjected  
454 to PCR genotyping and/or sequencing to confirm the allele replacement.

455

456 **Genetic complementation constructs in *C. crescentus*.** Tandem P1-*gsrN* alleles (overexpression by  
457 multiple copies of P1-*gsrN*) were constructed using a Gblock template amplified with three sets of unique  
458 primers. Each end of the amplified products contained unique overlap ends for Gibson assembly into  
459 pMT552 digested with KpnI and SacI. *gsrN* alleles cloned into the *vanA* locus are antisense to the  
460 vanillate inducible *vanA* promoter. An in-frame stop codon was designed at the restriction  
461 enzyme/ligation site downstream of the *vanA* promoter to ensure that translational read-through of the  
462 *vanA* transcript did not disrupt *gsrN* transcription. Xylose-inducible *osrP* (pMT680-*osrP*) had its entire  
463 coding sequence cloned in frame with the start site of *xyIX*.

464

465 **β-galactosidase reporter constructs.** Transcriptional and transcriptional-translational (TT) reporters  
466 utilized the replicating plasmids pRKlac290 and pPR9TT, respectively (39, 44). pRKlac290 has a  
467 tetracycline resistance marker and pPR9TT has a chloramphenicol resistance marker. Insertion  
468 sequences of *osrP* used the primers in **Table S2**. The template for *osrP(RS1)* was created using splice-  
469 overlap-extension and the template for *osrP(RS2)* was a gblock. Templates were then amplified with the  
470 same primers as the wild-type *osrP* reporters. The transcriptional reporter used the restriction sites

471 EcoRI and HindIII to ligate into pRKlac290. The transcriptional-translational reporter used the restriction  
472 sites KpnI and HindIII to ligate into pPR9TT.

473

474 **Osmotic stress assay.** Liquid cultures were passaged several times before stress treatment to ensure  
475 that population growth rate and density were as consistent as possible prior to addition of sucrose  
476 (hyperosmotic stress). Briefly, starter cultures were inoculated in liquid M2X medium from colonies grown  
477 on PYE-agar plates. Cultures were grown overnight at 30°C in a rolling incubator. Overnight cultures  
478 were then diluted back to an optical density reading of  $OD_{660} = 0.05$  and grown in a rolling incubator at  
479 30°C for 7–10 hr. After this period, cultures were re-diluted with M2X to  $OD_{660} = 0.025$  and grown  
480 overnight for 16 hr at 30°C in a rolling incubator. After this period,  $OD_{660}$  was consistently 0.85–0.90.  
481 These cultures were then diluted to  $OD_{660} = 0.05$  and grown for 1 hr and split into two tubes. One tube  
482 received sucrose treatment from a liquid stock of 80% (w/v) and the other tube was treated with water.  
483 Both cultures were grown for 5 hours in a rolling 30°C post treatment of a final concentration of 300 mM  
484 sucrose. This allowed for the dynamic range to compare CFUs from  $\Delta gsrN$ , wild type, and  $gsrN^{++}$ .  
485 Treated cultures and untreated cultures were subsequently titered in a 10-fold dilution series (10  $\mu$ L  
486 sample in 90  $\mu$ L of PYE) in 96-well plates. 5  $\mu$ L from each dilution were spotted on PYE-agar. Once  
487 spots dried, plates were incubated at 30°C for 2 days. Clearly visible colonies begin to form after 36  
488 hours in the incubator.

489

490 **Northern Blot.** RNA samples were resolved on a urea-denaturing 10% acrylamide: bisacrylamide (29:1),  
491 transferred onto a Zeta-Probe Blotting Membrane with a Trans-Blot® SD Semi-Dry Transfer Cell. Blots  
492 were hybridized with a hybridization buffer containing the radiolabeled oligonucleotide probes in a rolling  
493 65°C incubator. Hybridization buffer had a GsrN probe concentration  $\sim 1$  nM and 5S rRNA probe  
494 concentration was  $\sim 2$  pM. Membranes were then wrapped in plastic wrap and placed directly against a  
495 Molecular Dynamics Phosphor Screen. Screens were imaged with Personal Molecular Imager™ (PMI™)  
496 System. For detailed buffer recipes and step-by-step instructions refer to (11). Cultures used for the  
497 extraction of RNA were passaged in the same manner outlined in the “Osmotic stress assays” section

498 above. Exponential phase cultures were harvested from the last starter (i.e., the  $OD_{660}=0.05$  culture at  
499 the 16 hour time point) when it reached an  $OD_{660}$  of 0.20-0.25. Exponential phase cultures ( $OD_{660}$  of  
500 0.20-0.25) harvested for extraction of RNA were pelleted at 15000x g for 3 minutes at  $\approx 23^{\circ}\text{C}$  (i.e. room  
501 temperature) and subjected to a TRIzol extraction (refer to detailed protocol (11)). Radiolabeled  
502 oligonucleotides were labeled with T4 PNK (refer to (11) for detailed protocol). Oligonucleotide  
503 sequences used for Northern blot probing can be found in **Table S2** in the supplement material.

504

505 **RNA-Seq sample preparation and analysis.** RNA-Seq samples were extracted using the TRIzol  
506 protocol described in (11). For the first RNA-Seq experiment with seven  $\Delta sigT$  (3 stressed and 4  
507 unstressed) and eight WT (4 stressed and 4 unstressed) samples, cells were grown similarly to those  
508 described in the “Osmotic stress assay” section. Specifically, liquid M2X cultures were inoculated from  
509 PYE agar plates and grown shaking at 200 RPM,  $30^{\circ}\text{C}$  overnight. Cultures were then diluted into fresh  
510 M2X to  $OD_{660} = 0.025$  and grown at 200 RPM,  $30^{\circ}\text{C}$  for 18 hours. These overnight cultures were then  
511 diluted to  $OD_{660} = 0.15$ , and grown for 1 hour at 200 RPM,  $30^{\circ}\text{C}$  before the addition of 150 mM Sucrose  
512 (treated) or water (untreated). Samples were grown for 3 hours at 200 RPM,  $30^{\circ}\text{C}$  before TRIzol  
513 extractions. Resuspended RNA pellets after the 75% ethanol wash were purified twice by RNeasy Mini  
514 Kit column (100  $\mu\text{L}$  sample, 350  $\mu\text{L}$  RLT, 250  $\mu\text{L}$  100% ethanol). In each iteration, immobilized RNA was  
515 subjected to an on-column DNase digestion with TURBO™ DNase for 30 minutes at  $30^{\circ}\text{C}$  with 70  $\mu\text{L}$   
516 DNase Turbo (7  $\mu\text{L}$  DNase, 7 $\mu\text{L}$  10X Buffer, 56 $\mu\text{L}$  diH<sub>2</sub>O) before washing and elution. For the second  
517 RNA-Seq experiment with 8 *gsrN*<sup>+</sup> (4 stressed and 4 unstressed) and 6 WT (3 stressed and 3  
518 unstressed) samples, cells were grown as described in the “Osmotic stress assay” section. Specifically,  
519 treated cultures were grown for 5 hours in M2X with a final concentration 150 mM sucrose and untreated  
520 with water in a rolling  $30^{\circ}\text{C}$  incubator before TRIzol extractions. Resuspended RNA pellets after the 75%  
521 ethanol wash were loaded onto an RNeasy Mini Kit column (100  $\mu\text{L}$  sample, 350  $\mu\text{L}$  RLT, 250  $\mu\text{L}$  100%  
522 ethanol). Immobilized RNA was then subjected to an on-column DNase digestion with TURBO™ DNase.  
523 DNase treatment was repeated twice on the same column; each incubation was 30 minutes at  $30^{\circ}\text{C}$  with  
524 70  $\mu\text{L}$  solutions of DNase Turbo (7  $\mu\text{L}$  DNase, 7  $\mu\text{L}$  10x Buffer, 56  $\mu\text{L}$  diH<sub>2</sub>O). For all RNA-seq samples,

525 after elution from the RNeasy column, rRNA was depleted using Ribo-Zero rRNA Removal (Gram-  
526 negative bacteria) Kit (Epicentre). RNA-seq libraries were prepared with an Illumina TruSeq stranded  
527 RNA kit according to manufacturer's instructions. The libraries were sequenced on an Illumina HiSeq  
528 4000 at the University of Chicago Functional Genomics Facility. Analysis of whole genome RNA-seq  
529 data was conducted using the CLC Genomics Workbench version 11.0. Reads were mapped to the *C.*  
530 *crenscentus* NA1000 genome (accession CP001340.1) (45).

531

532 **Soluble protein extraction for LC-MS/MS and analysis.** Total soluble protein for proteomic  
533 measurements was extracted from cultures passaged similarly to the “Osmotic stress assays” section,  
534 except that cultures were subjected to 150 mM sucrose. Cells were spun down at 8000g at 4°C for 15  
535 minutes. Cells were resuspended in 6 mL of ice-cold lysis buffer. Cells were mechanically lysed in LV1  
536 Microfluidizer. Lysate was then spun down at 8000g at 4°C for 15 minutes. Protein samples were  
537 resolved on a 12% MOPS buffered 1D Gel (Thermo Scientific) for 10 minutes at 200V constant. Gel was  
538 stained with Imperial Protein stain (Thermo Scientific), and a ~2 cm plug was digested with trypsin.  
539 Detailed trypsin digestion and peptide extraction by the facility is published in (46). Samples for analysis  
540 were run on an electrospray tandem mass spectrometer (Thermo Q-Exactive Orbitrap), using a 70,000  
541 RP survey scan in profile mode, m/z 360-2000 Fa, with lockmasses, followed by 20 MS/MS HCD  
542 fragmentation scans at 17,500 resolution on doubly and triply charged precursors. Single charged ions  
543 were excluded, and ions selected for MS/MS were placed on an exclusion list for 60s (46). Raw files of  
544 LC-MS/MS data were processed using the MaxQuant software suite v1.5.1.2 (47). Samples were run  
545 against a FASTA file of proteins from the UniProt database (UP000001364) and standard contaminants.  
546 The label free quantitation (LFQ) option was turned on. Fixed modification included carbamidomethyl (C)  
547 and variable modifications were acetyl or formyl (N-term) and oxidation (M). Protein group files were  
548 created for two comparisons: wild-type (3 samples) versus *gsrN<sup>++</sup>* (4 samples) untreated and wild-type (3  
549 samples) versus *gsrN<sup>++</sup>* (4 samples) sucrose-treated. LFQ values for each proteingroup.txt file were  
550 extracted for analysis. Average LFQ values were only calculated if 2 or more LFQ values were found for  
551 wild-type samples and if 3 or more LFQ values were found for *gsrN<sup>++</sup>* samples. This allowed for protein

552 groups that had a sufficient amount of signal across all the samples and analyses to be considered for  
553 comparison. Once averages for each protein group were calculated, we calculated the fold change  
554 between samples from different backgrounds by dividing the averages and taking the log-2  
555 transformation,  $\log_2(\text{Fold})$ . Multiple t-tests were conducted using the LFQ criteria described previously.  
556 We used the multiple t-test analysis from GraphPad Prism version 7.0 for MacOS, GraphPad Software,  
557 La Jolla California USA, [www.graphpad.com](http://www.graphpad.com). The false discovery rate (Q) value was set to 5.000% and  
558 each row was analyzed individually, without assuming a consistent SD.

559

560  **$\sigma^T$ -binding site search.** A binding site search was conducted on negative differentially regulated genes  
561 identified in the RNA-Seq study (i.e. genes downregulated in  $\Delta sigT$  relative to wild type; fold change  $\leq$  -  
562 1.5 and FDR  $\leq$  0.05) (**Table S3**). From this set of genes, we organized all genes into operon units based  
563 on the DOOR database (48, 49); however, we only put a gene into the context of an operon if the leading  
564 gene in the operon was also in the core *sigT* regulon. We then took the lead genes for each operon and  
565 searched 250 nucleotides upstream of the annotated coding start site. These windows were then  
566 scanned for the degenerate  $\sigma^T$ -binding site combinations described in **Fig. S2**.

567

568 **5' rapid amplification of cDNA ends (RACE).** Rapid amplification of cDNA 5'ends of GsrN was carried  
569 out using components of the FirstChoice RLM-RACE Kit. Cloning of cDNA library was carried out with  
570 the Zero Blunt TOPO PCR Cloning Kit. Total RNA from *gsrN<sup>+</sup>* strains was extracted from stationary  
571 phase cultures (OD660 = 0.95–1.0) as described in the “Northern Blot” section. Briefly, 10  $\mu\text{L}$  Tobacco  
572 Acid Pyrophosphatase (TAP) reactions used 5  $\mu\text{g}$  of total RNA with 2  $\mu\text{L}$  of TAP and 1  $\mu\text{L}$  of TAP buffer  
573 with remaining volume comprised of Nuclease-free water. Reactions were incubated at 37°C for 1 hour.  
574 TAP-treated samples were then subjected to ligation in parallel with no-TAP total RNA samples. Tap  
575 RNA sample ligation reactions (10  $\mu\text{L}$ ) follow: 2  $\mu\text{L}$  of TAP treated RNA, 1  $\mu\text{L}$  of 5'RACE adaptor, 1  $\mu\text{L}$  of  
576 T4 RNA Ligase, 1  $\mu\text{L}$  10X T4 RNA Ligase Buffer, and 4  $\mu\text{L}$  Nuclease-free water. No-TAP RNA sample  
577 ligation reactions (10  $\mu\text{L}$ ) follow: 3  $\mu\text{g}$  of untreated total RNA, 1  $\mu\text{L}$  of 5'RACE adaptor, 1  $\mu\text{L}$  of T4 RNA  
578 Ligase, 1  $\mu\text{L}$  10X T4 RNA Ligase Buffer, and remaining volume of Nuclease-free water. Reactions were



579 incubated at 37°C for 1 hr. For the reverse transcription reaction (first strand synthesis), we used the  
580 random dodecamer provided in the kit, as well as, the M-MLV Reverse transcriptase and used the  
581 recommended reaction volumes in the kit. Reaction was incubated at 42°C for 1 hour. Samples were  
582 then kept frozen in a -20°C freezer. For second strand synthesis and amplification, we used KOD Hot  
583 Start DNA Polymerase with the 5'RACE inner primer complementary to the adapter and an *osrP*-specific  
584 primer 380 nucleotides away from the coding start site (**Table S2**). The 25  $\mu$ L reactions follow: 12.5  $\mu$ L  
585 2X Buffer, 0.5  $\mu$ L KOD Polymerase, 5  $\mu$ L of 2 mM dNTP, 2.5  $\mu$ L of 50% DMSO, 1.5  $\mu$ L of 5 mM forward  
586 primer, 1.5  $\mu$ L of 5 mM reverse primer, and 1.5  $\mu$ L of reverse transcribed 1st strand synthesis cDNA.  
587 Reaction protocol follows: 3 min 95°C incubation, followed by a 35-cycle reaction consisting of a 15 s  
588 95°C melting step, a 15 s 60°C annealing step, a 30 s 68°C extension step, and a final 1 min 68°C  
589 extension step. PCR products were blunt-cloned using the Zero Blunt TOPO PCR Cloning Kit. First, a 5  
590  $\mu$ L pre-reaction mix consisting of 2  $\mu$ L PCR product, 1  $\mu$ L kit salt solution, and 2  $\mu$ L water was prepared.  
591 1  $\mu$ L of the pCR-Blunt II-TOPO was then added to the pre-reaction mix and incubated at room  
592 temperature for 5 min and then immediately put on ice. Ligation reaction was then incubated with ice-  
593 thawed chemically competent *E. coli* cells for 5 min. Cells were heat shocked for 30 s at 42°C, then  
594 incubated on ice for 5 min. 250  $\mu$ L of SOC media was then added to the cells and incubated 37°C in a  
595 shaking incubator. Fifty microliters of outgrown cells were placed on LB-Kanamycin plates with an  
596 antibiotic concentration of 50  $\mu$ g/mL. Single colonies were grown overnight and sequenced with an  
597 internal *osrP* specific primer that maps 300 nucleotides from the annotated coding start and M13R  
598 primers (**Table S2**). Sequences were submitted to the University of Chicago Comprehensive Cancer  
599 Center DNA Sequencing and Genotyping Facility. Chromatograph traces were analyzed with Geneious  
600 11.0.2. Traces were subjected to mapping and trimming of the 5'RACE inner primer/adaptor sequence  
601 and the flanking regions used for blunt-cloning.

602

603  **$\beta$  -galactosidase assay.** To assess reporter gene expression, liquid cultures were passaged several  
604 times as described in the "Osmotic stress assay" section above. However, cultures were placed in a  
605 30°C shaker instead of a 30°C rolling incubator. Exponential phase cultures were taken from the  $OD_{660} =$

606 0.05 culture made from the 16 hr overnight culture and split when an OD<sub>660</sub> ~.09-0.1 was reached. One  
607 split culture was treated to a final concentration of 150 mM sucrose and the other with the equal volume  
608 of water. Stress and unstressed cultures were then grown for three hours in a 30°C shaker and then  
609 harvested. β-galactosidase activity from chloroform-permeabilized cells was measured using the  
610 colorimetric substrate o-nitrophenyl-b-D-galactopyranoside (ONPG). 1 mL enzymatic reactions contained  
611 350 μL of chloroform-permeabilized cells, 550 μL of Z-buffer (60 mM Na<sub>2</sub>HPO<sub>4</sub>, 40 mM, NaH<sub>2</sub>PO<sub>4</sub>, 10  
612 mM KCl, 1 mM MgSO<sub>4</sub>), and 200 μL of 4 mg/mL ONPG in 0.1 M KPO<sub>4</sub>, pH 7.0. Chloroform-  
613 permeabilized cell samples were prepared from 150 μL of culture, 100 μL of PYE, and 100 μL of  
614 chloroform (chloroform volume is not included in the final calculation of the 1 mL reaction). Chloroform-  
615 treated cells were vortexed for 5–10 seconds to facilitate permeabilization. Z buffer and ONPG were  
616 added directly to chloroform-permeabilized cells. Reactions were incubated in the dark at room  
617 temperature and quenched with 1 mL of 1 M Na<sub>2</sub>CO<sub>3</sub>. Each reporter construct was optimized with  
618 different reaction times empirically determined by the development of the yellow ONPG pigment. Miller  
619 units were calculated as:

$$MU = \frac{A_{420} \times 1000}{A_{660} \times t \times v}$$

620 A<sub>420</sub> is the absorbance of the quenched reaction measured at 420 nm on a Spectronic Genesys 20  
621 spectrophotometer (ThermoFisher Scientific, Waltham, MA). A<sub>660</sub> is the optical density of the culture of  
622 cells used for the assay. *t* is time in minutes between the addition of ONPG and the quenching with  
623 Na<sub>2</sub>CO<sub>3</sub>. *v* is the volume in milliliters of the culture added to the reaction.

624

625 **Western Blot.** Strains from which protein samples were prepared for Western blot analysis were grown  
626 and passaged as outlined in the “Osmotic stress assays” section; however, cultures were grown to an  
627 OD<sub>660</sub>=0.25-0.30, split, and treated with 150 mM sucrose for 3.5 hours. This change allowed for detection  
628 of *osrP::FLAG* signal in untreated *gsrN*<sup>++</sup> cultures and treated wild-type cultures. 4.5 mL of these cultures  
629 was then pelleted, resuspended in 100 μL of Western blot buffer (10 mM Tris pH 7.4, 1 mM CaCl<sub>2</sub>, and 5  
630 μg/mL of DNase), and mixed with 100 μL SDS-Loading buffer. Samples were boiled at 85°C for 10  
631 minutes, and 25-30 μL of each sample was loaded onto a Mini-PROTEAN TGX Precast Gradient Gel (4-



632 20%) with Precision Plus Protein™ Kaleidoscope™ Prestained Protein Standards. Samples were  
633 resolved at 35 mA constant current in SDS running buffer (0.3% Tris, 18.8% Glycine, 0.1% SDS). Gels  
634 were run until the 25 kDa marker reached the bottom of the gel. Gel was transferred to an Immobilon®-P  
635 PVDF Membrane using a Mini Trans-Blot® Cell after preincubation in Western transfer buffer (0.3% Tris,  
636 18.8% Glycine, 20% methanol). Transfer was carried out at 4°C, 100 V for 1 hour and 20 minutes in  
637 Western transfer buffer. The membrane cut into two pieces right above the 50kD marker. Top half was  
638 stained with Coomassie Brilliant Blue for 10 minutes, washed with 45% Ethanol and 10 % Acetic acid,  
639 and then washed again with 90% Ethanol 10% Acetic acid. Upon destaining, image was taken with a  
640 ChemiDoc MP Imaging System version 6.0. Bottom half was blocked in 5% (w/v) powdered milk in Tris-  
641 buffered saline with tween (TBST: 137 mM NaCl, 2.3 mM KCl, 20 mM Tris pH 7.4, 0.1% (v/v) Tween 20)  
642 overnight at room temperature on a rotating platform. Primary incubation with an anti-DYKDDDDK  
643 Monoclonal Antibody (clone FG4R) was carried out for 3 hours in 5% powdered milk TBST at room  
644 temperature on a rotating platform (4 µL antibody in 12 mL). Membrane was then washed 3 times in  
645 TBST for 5 minutes each at room temperature on a rotating platform. Secondary incubation with Goat  
646 anti-Mouse IgG (H+L) Secondary Antibody, HRP was for 1 hour at room temperature on a rotating  
647 platform (3 µL antibody in 15 mL). Finally, membrane was washed 3 times in TBST for 10 minutes each  
648 at room temperature on a rotating platform. Chemiluminescence was performed using the SuperSignal™  
649 West Femto Maximum Sensitivity Substrate and was imaged using a ChemiDoc MP Imaging System  
650 version 6.0. Chemiluminescence was measured using the ChemSens program with an exposure time of  
651 ~2.5 minutes.

652 **Accession number(s).** RNA-Seq data are available in the NCBI GEO Database under accession  
653 GSE114971. LC-MS/MS data is available in the PRIDE proteomic database under accession  
654 PXD010072.

#### 655 **Acknowledgements**

656 We thank Aretha Fiebig for constructive feedback on this manuscript during the revision process. This  
657 work was funded by NIH award R01GM087353 to S.C. M.Z.T. was supported by an NSF Graduate  
658 Research Fellowship, and B.J.S. is supported by NIH award F32GM128283.

659

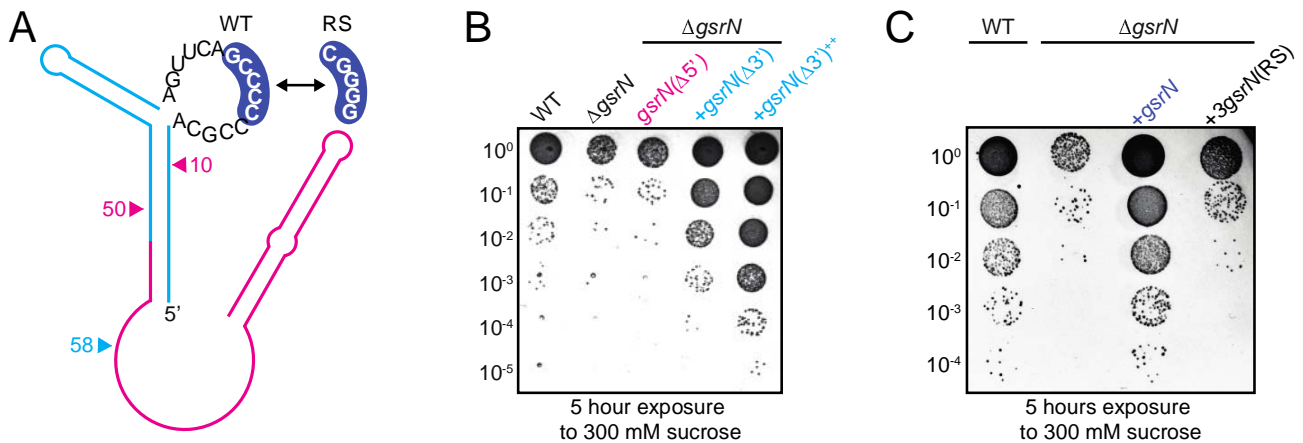

660

661 **FIG 1. Modifying the 5' cytosine-rich loop of GsrN reduces *Caulobacter* viability under hyperosmotic stress.**

662 (A) Secondary structure model of GsrN. Bases in the 5' C-rich loop are displayed. GsrN undergoes endonucleolytic  
663 processing; cyan lines indicate the 5' end of GsrN and pink lines indicate the 3' end of GsrN (post-processing). Pink  
664 arrows refer to residues 10 and 50, which are the sites of deletion in the strain *gsrN*( $\Delta$ 5'). Cyan arrow marks the 5'  
665 end of GsrN construct, *gsrN*( $\Delta$ 3'). Blue highlighted bases in the C-rich loop of GsrN were replaced in the mutant,  
666 *gsrN*(RS). (B) Hyperosmotic stress survival assay of *Caulobacter* wild type (WT) and *gsrN* mutant strains. Strains  
667 were treated with 300 mM sucrose for 5 hours and colony forming units (CFUs) were enumerated. (C)  
668 Hyperosmotic survival assay of WT and  $\Delta$ *gsrN* complemented with either wild-type *gsrN* or *gsrN*(RS). Plates in B  
669 and C are representative of triplicate assays. Quantification of CFUs in treated versus untreated strains are  
670 presented in Fig. S1 in supplemental material.

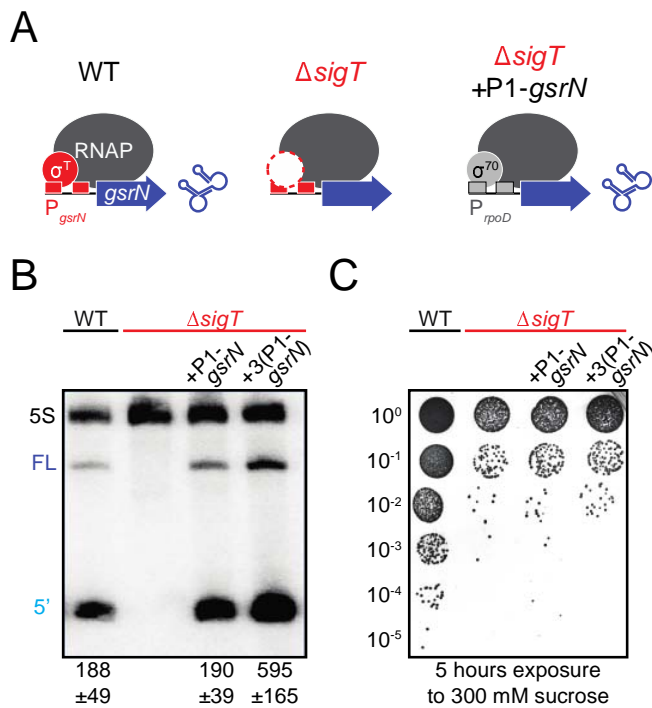

671

672 **FIG 2. *gsrN*-dependent osmotic stress protection requires *sigT*.** (A) Schematic of *gsrN* transcription in wild type  
673 (WT),  $\Delta sigT$ , and a  $\Delta sigT$  strain bearing the P1-*gsrN* expression system ( $\Delta sigT$ +P1-*gsrN*). P1 is a RpoD( $\sigma^{70}$ )-  
674 dependent promoter. (B) Northern blot of total RNA from wild type,  $\Delta sigT$ ,  $\Delta sigT$ +P1-*gsrN*, and  $\Delta sigT$ +3(P1-*gsrN*)  
675 probed with radiolabeled oligos specific to GsrN and 5S rRNA (loading control). Labels on the left refer to 5S rRNA  
676 (5S in black), full-length GsrN (FL in dark blue), and the 5' isoform of GsrN (5' in cyan). Quantified values below the  
677 blot are mean  $\pm$  SD of total (FL + 5') normalized signal, n = 3 independent replicates. (C) Hyperosmotic stress  
678 survival assay of the strains in B. Plate is representative of triplicate assays. Quantification of CFUs in treated  
679 versus untreated strains are presented in Fig. S1 in supplemental material.

680

681

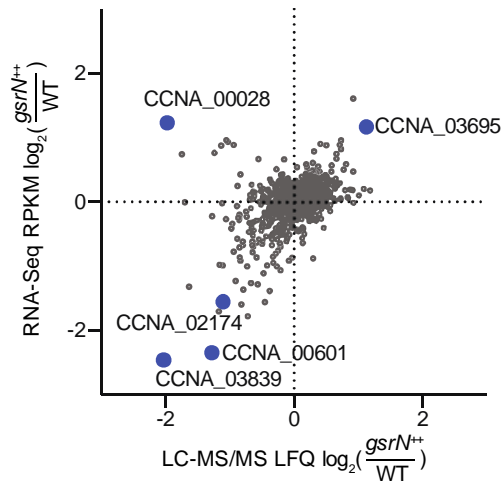

682

683 **FIG 3. *gsrN*-regulated genes under hyperosmotic conditions.** Transcriptomic and proteomic analysis of *gsrN<sup>++</sup>*  
684 and wild type (WT) strains after sucrose-induced hyperosmotic stress. Relative reads per kilobase per million  
685 (RPKM) for transcriptomics and label-free quantitation (LFQ) for proteomics are plotted. Only genes detected in  
686 both analyses are plotted. Blue points indicate genes for which transcript and protein levels differed significantly  
687 between *gsrN<sup>++</sup>* and WT. Significant differential regulation cutoff was  $\log_2(\text{fold}) > 1.0$  and FDR *p-value* < 0.05 for  
688 both transcript and protein based on Wald's Test and Student's t-test, respectively. RNA-Seq data set comprises of  
689 3 wild-type unstressed, 3 wild-type stressed, 4 *gsrN<sup>++</sup>* unstressed, and 4 *gsrN<sup>++</sup>* stressed conditions. LC-MS/MS  
690 data set comprises the same number of samples for each respective strain and treatment.

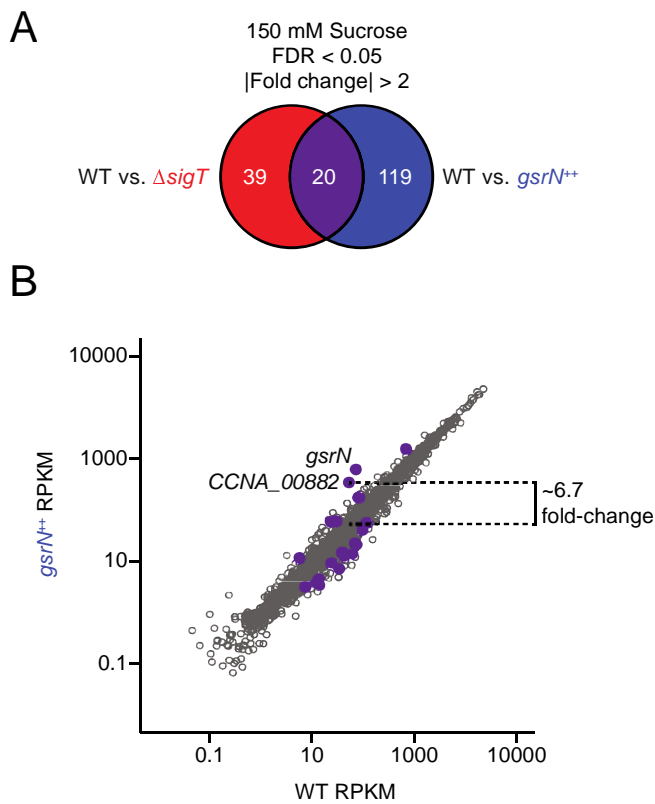

691

692 **FIG 4. Comparative RNA-seq analysis uncovers candidate targets of GsrN under hyperosmotic stress.** (A)

693 RNA-Seq Venn summary of genes differentially regulated in  $\Delta sigT$  (red) and  $gsrN^{++}$  (blue) during sucrose-induced

694 hyperosmotic stress; the shared gene set is highlighted in purple. Significant differential regulation cutoff was

695  $\log_2(\text{fold}) > 1.0$  and FDR  $p$ -value < 0.05 for both comparisons. (B) Measured transcript abundance, reads per

696 kilobase per million (RPKM), in WT and  $gsrN^{++}$  samples subjected to sucrose-induced hyperosmotic stress. Purple

697 points represent genes identified in (A). Dotted line highlights the 2.7  $\log_2(\text{fold})$  change of *CCNA\_00882* (*osrP*)

698 between  $gsrN^{++}$  and WT.

699

700

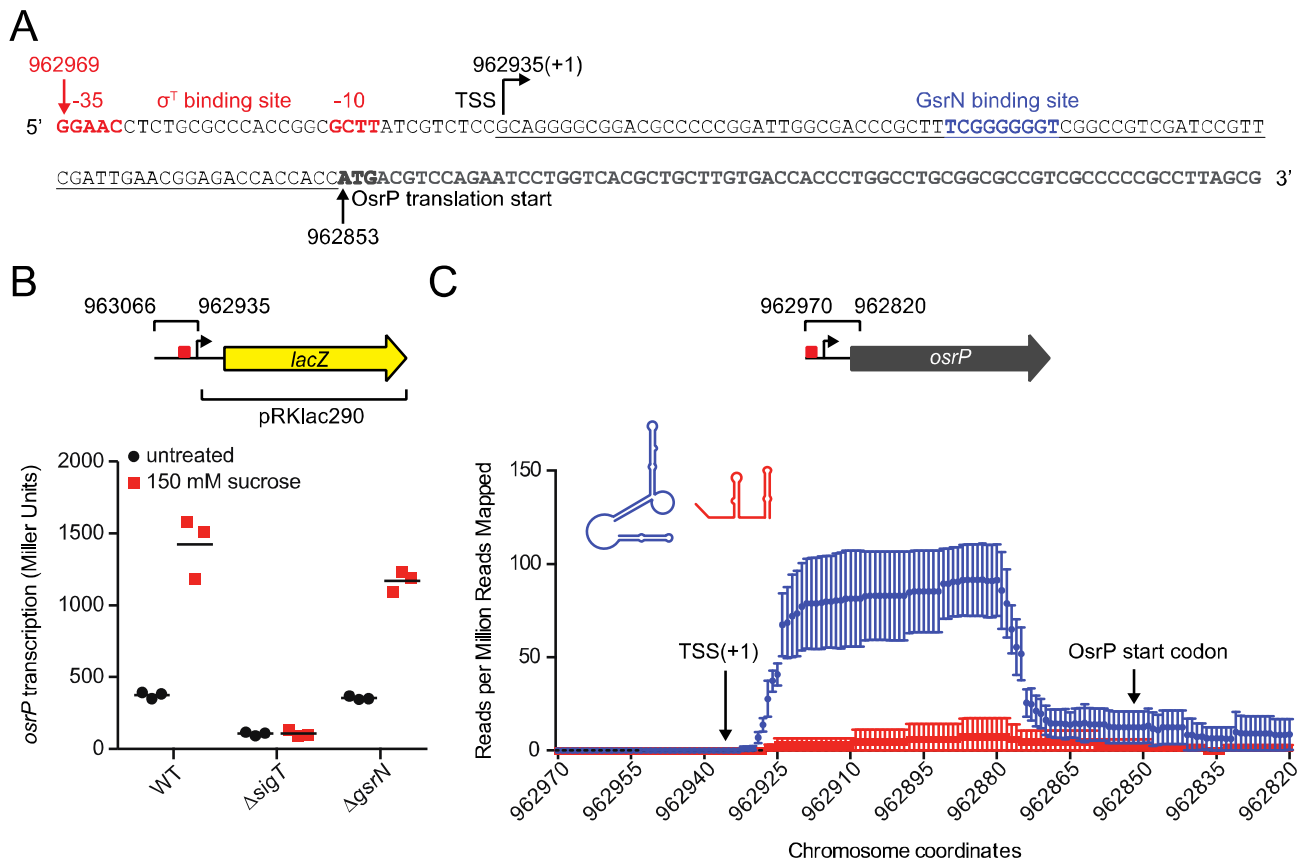

701

702 **FIG 5. *osrP* is transcribed by  $\sigma^T$  and is upregulated during hyperosmotic stress.** (A) *osrP* promoter and leader  
 703 sequence. Bent arrow indicates the location of the transcription start site (TSS) mapped by 5' RACE. The proposed  
 704  $\sigma^T$ -binding site at -10 and -35 is in red. The proposed GsrN binding site from (11) is in blue. Black arrow and bolded  
 705 nucleotides indicate the annotated translation start site of *osrP*. The 5' leader of *osrP* mRNA is underlined.  
 706 Numbers correspond to nucleotide positions in genome accession NC\_011916 (B)  $\beta$ -galactosidase activity assay  
 707 (in Miller Units) of the pRKLac290-*osrP* transcriptional reporter plasmid in wild type (WT),  $\Delta$ sigT, and  $\Delta$ gsrN  
 708 backgrounds; a schematic of the reporter plasmid marking the cloned region of the *osrP* promoter with the  $\sigma^T$ -  
 709 binding site (red) is pictured above. Activities in log phase cultures without or with 150 mM sucrose (3 hour  
 710 treatment) are in black circles and red squares, respectively. Horizontal bars mark the mean of three independent  
 711 biological replicates. (C) mRNA that co-purified with *gsrN(37)::PP7hp* (aptamer-tagged GsrN; blue) and  
 712 *PP7hp::gsrN-3'* (negative control; red) quantified as fractional reads mapped to the leader region of *osrP*. Read  
 713 density in each dataset represents read coverage at each nucleotide divided by the number of million reads  
 714 mapped in that data set. Data represent mean  $\pm$ SD of three replicate *gsrN(37)::PP7hp* and two replicate  
 715 *PP7hp::gsrN-3'* purifications.

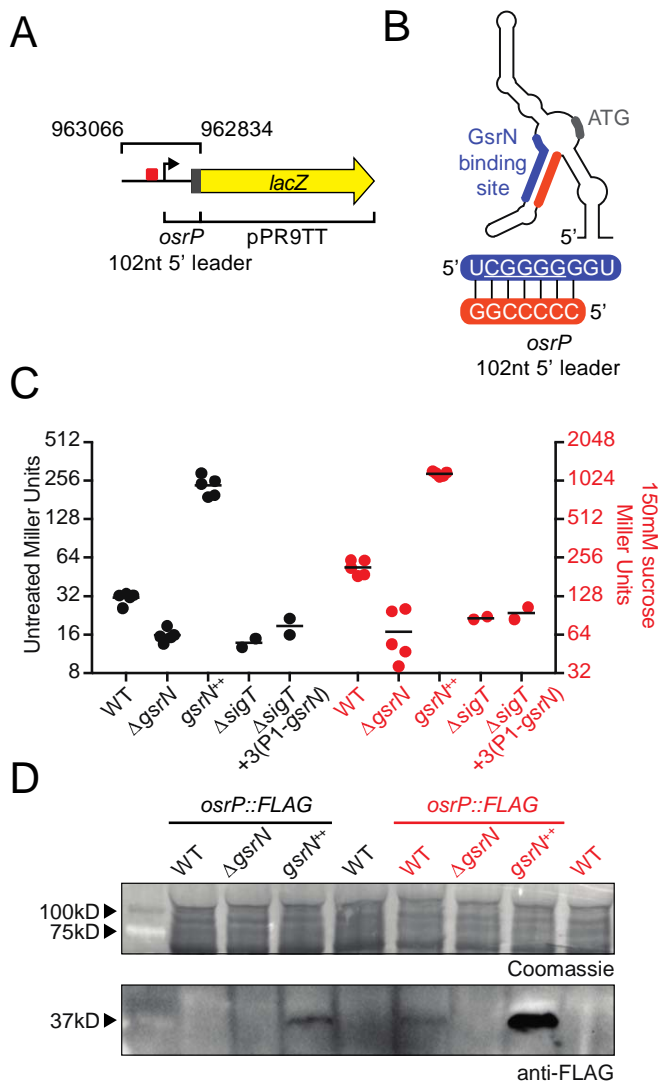

716

717 **FIG 6. GsrN activates the expression of OsrP at the post-transcriptional level.** (A) Schematic of pPR9TT-*osrP*  
 718 transcription plus translation (TT) reporter plasmid. The nucleotide positions of the *osrP* genome region (upstream  
 719 region, 5' UTR, and nucleotides encoding the first 7 amino acids) fused to *lacZ* are indicated on the upper bracket.  
 720 5' leader of *osrP* (5' UTR and nucleotides encoding the first 7 amino acids) is marked with the bottom bracket. (B)  
 721 Predicted secondary structure (26) of 5' leader of *osrP*. A proposed GsrN binding site is highlighted in blue (see  
 722 also Fig 5). Base-paired region complementary to the proposed GsrN binding site is highlighted in orange. Start  
 723 codon is highlighted in grey. Sequence below shows the interaction between the predicted GsrN-binding site and  
 724 the complementary base-paired region within the 5' leader of *osrP*. (C)  $\beta$ -galactosidase activity assay (in Miller  
 725 Units) from the pPR9TT-*osrP* TT reporter plasmid. Left black axis represents reporter activity in untreated cultures.  
 726 Right red axis represents reporter activity in cultures treated with 150 mM sucrose for 3 hours. Data and mean  
 727 represent at least two biological replicates. (D) Western analysis of total protein from WT,  $\Delta$ *gsrN*, and *gsrN*<sup>+</sup>  
 728 strains containing *osrP*::FLAG, Untreated and hyperosmotic treated (150 mM sucrose) cultures are black and red,

729 respectively. After transfer, the top portion of the membrane was Coomassie-stained as a loading control (top  
730 panel). The bottom portion of the membrane was blotted with anti-FLAG antibodies (lower panel). Blot is  
731 overexposed to reveal weaker bands. As a result, the OsrP::FLAG signal in the *gsrN<sup>++</sup>* treated lane is saturated.  
732 Arrows on the left indicate protein size markers. Blot and stained membrane are representative of duplicate  
733 experiments.



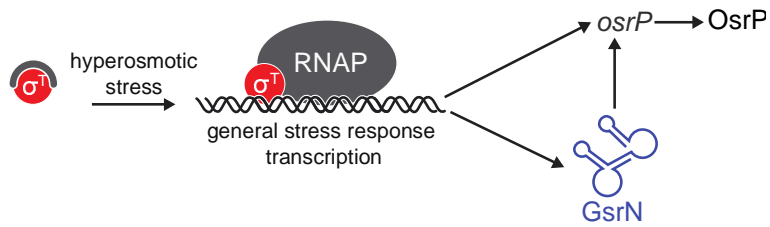

734

735 **FIG 7. Coherent feedforward regulation during hyperosmotic stress in *C. crescentus*.**  $\sigma^T$  is de-repressed  
736 upon exposure to hyperosmotic stress, and binds to core RNA polymerase (RNAP).  $\sigma^T$  subsequently activates  
737 transcription of a set of genes (see Table S3), including the sRNA, GsrN. GsrN accumulates in the cell and  
738 functions to either activate or repress expression of genes at the post-transcriptional level (see Table S4). *osrP* is  
739 among a set of genes in the GSR hyperosmotic stress regulon that are upregulated by  $\sigma^T$  at the transcriptional level  
740 and also upregulated by GsrN at the post-transcriptional level, i.e. coherent feedforward regulation.

741

742  
743

**TABLE 1** Proteins with significant differences in steady-state levels between *gsrN<sup>++</sup>* and wild type (*gsrN<sup>++</sup>* / WT), with associated transcript changes.

| gene name  | annotated function                                                            | RNA-Seq <sup>a</sup>          |                 |        | LC-MS/MS <sup>b</sup>         |                 |        |
|------------|-------------------------------------------------------------------------------|-------------------------------|-----------------|--------|-------------------------------|-----------------|--------|
|            |                                                                               | <i>log<sub>2</sub></i> (Fold) | <i>p</i> -value | FDR    | <i>log<sub>2</sub></i> (Fold) | <i>p</i> -value | FDR    |
| CCNA_02831 | conserved hypothetical protein                                                | -0.57                         | 0               | 0.0002 | -1.10                         | 0.0001          | 0.0134 |
| CCNA_03693 | creatinine amidohydrolase family protein                                      | 0.30                          | 0.0042          | 0.0516 | -1.57                         | 0.0043          | 0.0488 |
| CCNA_01997 | ribosome recycling factor (RRF)                                               | 0.26                          | 0.0687          | 0.3189 | -1.20                         | 0.0002          | 0.0134 |
| CCNA_03852 | phosphoribosylformimino-5-aminoimidazole carboxamide ribonucleotide isomerase | 0.17                          | 0.0883          | 0.3601 | -1.62                         | 0               | 0.0093 |
| CCNA_02388 | ribose 5-phosphate isomerase                                                  | -0.18                         | 0.1314          | 0.4512 | -1.04                         | 0.0002          | 0.0134 |
| CCNA_01378 | protein-L-isoaspartate O-methyltransferase                                    | 0.17                          | 0.1427          | 0.4707 | -1.09                         | 0.0005          | 0.0156 |
| CCNA_03874 | carboxymethylenebutenolidase                                                  | 0.18                          | 0.1805          | 0.5301 | -1.42                         | 0.0008          | 0.0201 |
| CCNA_03729 | transaldolase-like protein                                                    | 0.18                          | 0.2041          | 0.5633 | -1.39                         | 0               | 0.0093 |
| CCNA_01327 | adenylate kinase/nucleoside-diphosphate kinase Adk                            | 0.15                          | 0.2295          | 0.5976 | -1.93                         | 0.0001          | 0.0134 |
| CCNA_01586 | ABC transporter, ATP-binding protein                                          | 1.15                          | 0.2831          | 0.6632 | -1.97                         | 0.0011          | 0.0232 |
| CCNA_01624 | orotate phosphoribosyltransferase                                             | 0.14                          | 0.3167          | 0.6997 | -1.21                         | 0.0014          | 0.0250 |
| CCNA_00045 | inorganic pyrophosphatase                                                     | 0.12                          | 0.3566          | 0.7311 | -1.27                         | 0.0003          | 0.0155 |
| CCNA_03672 | superoxide dismutase                                                          | -0.12                         | 0.5448          | 0.8605 | -1.22                         | 0.0002          | 0.0134 |
| CCNA_01562 | 4-hydroxy-2-oxoglutarate aldolase/2-dehydro-3-deoxyphosphogluconate aldolase  | 0.06                          | 0.5595          | 0.8694 | -1.10                         | 0.0003          | 0.0142 |
| CCNA_01179 | 3'-phosphoadenosine 5'-phosphosulfate sulfotransferase CysH                   | -0.08                         | 0.6128          | 0.8957 | -1.12                         | 0.0028          | 0.0380 |
| CCNA_02741 | conserved hypothetical protein                                                | -0.13                         | 0.6809          | 0.9288 | -1.45                         | 0               | 0.0088 |
| CCNA_01960 | acetyl-CoA carboxylase biotin carboxyl carrier protein subunit                | -0.04                         | 0.7571          | 0.9519 | -1.94                         | 0.0004          | 0.0156 |
| CCNA_00545 | acetoacetyl-CoA reductase                                                     | 0.05                          | 0.8240          | 0.9722 | -1.32                         | 0.0004          | 0.0156 |
| CCNA_01747 | 3-oxoacyl-(acyl-carrier protein) reductase                                    | 0.02                          | 0.8455          | 0.9775 | -1.17                         | 0.0002          | 0.0134 |
| CCNA_01991 | OmpH-like outer membrane protein                                              | 0.05                          | 0.8580          | 0.9800 | -1.22                         | 0.0002          | 0.0134 |
| CCNA_03584 | histidine phosphotransferase ChpT                                             | 0.02                          | 0.8796          | 0.9871 | -1.40                         | 0.0003          | 0.0146 |
| CCNA_02293 | thiol:disulfide interchange protein TlpA                                      | 0.02                          | 0.9070          | 0.9926 | -1.05                         | 0.0005          | 0.0156 |

744  
745  
746  
747  
748

<sup>a</sup>Wald's Test

<sup>b</sup>Student's t-test

\* *p* values and FDR value of zero are < 1e<sup>-17</sup>

749 **TABLE 2** Proteins with significant differences in steady-state levels between *gsrN<sup>+</sup>* and wild type (*gsrN<sup>+</sup>* / WT) during  
750 hyperosmotic stress, with associated transcript changes.

| gene name  | annotated function                 | RNA-Seq <sup>a</sup>           |                  |         | LC-MS/MS <sup>b, ‡</sup>       |                 |         |
|------------|------------------------------------|--------------------------------|------------------|---------|--------------------------------|-----------------|---------|
|            |                                    | <i>log</i> <sub>2</sub> (Fold) | <i>p</i> -value* | FDR*    | <i>log</i> <sub>2</sub> (Fold) | <i>p</i> -value | FDR     |
| CCNA_03839 | acylamino-acid-releasing enzyme    | -2.46                          | 0                | 0       | -2.03                          | 0.00027         | 0.01505 |
| CCNA_00601 | MoxR-like ATPase                   | -2.34                          | 0                | 0       | -1.28                          | 0.00058         | 0.02198 |
| CCNA_02174 | multidrug resistance efflux pump   | -1.55                          | 0                | 0       | -1.10                          | 0.00236         | 0.03647 |
| CCNA_02540 | N-acyl-L-amino acid amidohydrolase | -0.98                          | 0                | 0       | -1.16                          | 0.00057         | 0.02198 |
| CCNA_00214 | TonB-dependent receptor            | 0.74                           | 6.6e-07          | 8.5E-06 | -1.74                          | 0.00184         | 0.03167 |
| CCNA_03023 | TonB-dependent receptor            | 0.88                           | 4.38E-09         | 7.5E-08 | -1.13                          | 0.00250         | 0.03648 |
| CCNA_03157 | conserved hypothetical protein     | 0.96                           | 1.22E-09         | 2.4E-08 | -1.05                          | 0.00421         | 0.04462 |
| CCNA_03695 | aldehyde dehydrogenase             | 1.17                           | 0                | 0       | 1.13                           | 0.00465         | 0.04462 |
| CCNA_00028 | TonB-dependent receptor            | 1.23                           | 1.8E-13          | 4.9E-12 | -1.97                          | 0.00066         | 0.02198 |

751 <sup>a</sup>Wald's Test

752 <sup>b</sup>Student's t-test

753 \* *p* values and FDR value of zero are < 1e<sup>-17</sup>

754 ‡ OsrP was not detected by global LC-MS/MS proteomic analysis.

755

756 **Table 3.** RNA-seq analysis of  $\Delta sigT$  and  $gsrN^{++}$  during hyperosmotic stress.

| gene name                 | annotated function                                  | $gsrN^{++}/WT$  |                         |                  | $\Delta sigT/WT$ |                         |                  |
|---------------------------|-----------------------------------------------------|-----------------|-------------------------|------------------|------------------|-------------------------|------------------|
|                           |                                                     | $\log_2$ (Fold) | $p$ -value <sup>1</sup> | FDR <sup>1</sup> | $\log_2$ (Fold)  | $p$ -value <sup>1</sup> | FDR <sup>1</sup> |
| <i>gsrN</i>               | cell cycle regulated sRNA <i>gsrN</i>               | 3.14            | 0                       | 0                | -6.27            | 7.98E-14                | 3.33E-12         |
| <i>CCNA_00882</i>         | hypothetical protein                                | 2.75            | 0                       | 0                | -5.82            | 0                       | 0                |
| <i>CCNA_03694</i>         | AcoR-family transcriptional regulator               | 1.37            | 0                       | 0                | -1.64            | 0                       | 0                |
| <b><i>CCNA_00028*</i></b> | TonB-dependent receptor                             | 1.23            | 1.82E-13                | 4.90E-12         | -1.32            | 2.85E-14                | 1.27E-12         |
| <b><i>CCNA_03695*</i></b> | aldehyde dehydrogenase                              | 1.17            | 0                       | 0                | -1.40            | 1.10E-05                | 1.52E-04         |
| <i>CCNA_03889</i>         | conserved hypothetical protein                      | 1.10            | 1.55E-04                | 1.25E-03         | -1.30            | 1.92E-12                | 7.13E-11         |
| <i>CCNA_00709</i>         | hypothetical protein                                | 1.07            | 5.67E-04                | 3.89E-03         | -6.22            | 3.90E-06                | 5.97E-05         |
| <i>CCNA_01089</i>         | conserved hypothetical protein                      | -1.00           | 1.11E-16                | 4.12E-15         | 1.18             | 5.44E-13                | 2.10E-11         |
| <i>CCNA_02051</i>         | imidazolonepropionase related amidohydrolase        | -1.22           | 0                       | 0                | 1.11             | 3.09E-09                | 7.70E-08         |
| <i>CCNA_01653</i>         | cyclophilin-type peptidylprolyl cis-trans isomerase | -1.23           | 0                       | 0                | 1.39             | 0                       | 0                |
| <i>CCNA_00243</i>         | hypothetical protein                                | -1.33           | 0                       | 0                | 1.25             | 3.13E-11                | 9.84E-10         |
| <i>CCNA_03082</i>         | hypothetical protein                                | -1.34           | 0                       | 0                | 1.24             | 2.82E-12                | 1.03E-10         |
| <i>CCNA_01100</i>         | acylamino-acid-releasing enzyme                     | -1.55           | 0                       | 0                | 1.16             | 9.52E-10                | 2.56E-08         |
| <b><i>CCNA_02174*</i></b> | multidrug resistance efflux pump                    | -1.55           | 0                       | 0                | 2.32             | 0                       | 0                |
| <i>CCNA_02935</i>         | methyl-accepting chemotaxis protein                 | -1.66           | 0                       | 0                | 2.12             | 0                       | 0                |
| <i>CCNA_02172</i>         | ABC-type transporter, permease component            | -1.72           | 0                       | 0                | 2.37             | 0                       | 0                |
| <i>CCNA_02173</i>         | ABC transporter ATP-binding protein                 | -1.79           | 0                       | 0                | 2.29             | 0                       | 0                |
| <i>CCNA_01247</i>         | CESA-like glycosyltransferase                       | -2.00           | 0                       | 0                | -1.53            | 6.29E-10                | 1.72E-08         |
| <i>CCNA_02050</i>         | imidazolonepropionase related amidohydrolase        | -2.10           | 0                       | 0                | 1.29             | 2.91E-08                | 6.51E-07         |
| <i>CCNA_03687</i>         | carbonic anhydrase                                  | -2.24           | 0                       | 0                | 1.99             | 0                       | 0                |

757 Genes also identified in Fig. 3

758 <sup>1</sup> p values and FDR value of zero are < 1e-17

759 **References**

760

- 761 1. Hoch JA, Silhavy TJ. 1995. Two-Component Signal Transduction. ASM Press, Washington, D.C.
- 762 2. Helmann JD. 2002. The extracytoplasmic function (ECF) sigma factors. *Adv Microb Physiol* 46:47-110.
- 763 3. Paget MS. 2015. Bacterial Sigma Factors and Anti-Sigma Factors: Structure, Function and
- 764 Distribution. *Biomolecules* 5:1245-65.
- 765 4. Bastiat B, Sauviac L, Bruand C. 2010. Dual control of *Sinorhizobium meliloti* RpoE2 sigma factor
- 766 activity by two PhyR-type two-component response regulators. *J Bacteriol* 192:2255-65.
- 767 5. Francez-Charlot A, Frunzke J, Reichen C, Ebnetter JZ, Gourion B, Vorholt JA. 2009. Sigma factor
- 768 mimicry involved in regulation of general stress response. *Proc Natl Acad Sci U S A* 106:3467-72.
- 769 6. Herrou J, Foreman R, Fiebig A, Crosson S. 2010. A structural model of anti-anti-sigma inhibition
- 770 by a two-component receiver domain: the PhyR stress response regulator. *Mol Microbiol* 78:290-
- 771 304.
- 772 7. Lourenco RF, Kohler C, Gomes SL. 2011. A two-component system, an anti-sigma factor and two
- 773 paralogous ECF sigma factors are involved in the control of general stress response in
- 774 *Caulobacter crescentus*. *Mol Microbiol* 80:1598-612.
- 775 8. Fiebig A, Herrou J, Willett J, Crosson S. 2015. General Stress Signaling in the
- 776 Alphaproteobacteria. *Annu Rev Genet* 49:603-25.
- 777 9. Francez-Charlot A, Kaczmarczyk A, Fischer HM, Vorholt JA. 2015. The general stress response
- 778 in Alphaproteobacteria. *Trends Microbiol* 23:164-71.
- 779 10. Tien MZ. 2017. Iterative Rank, GitHub, <https://github.com/mtien/IterativeRank>.
- 780 11. Tien M, Fiebig A, Crosson S. 2018. Gene network analysis identifies a central post-transcriptional
- 781 regulator of cellular stress survival. *Elife* 7:e33684.
- 782 12. Andersen J, Forst SA, Zhao K, Inouye M, Delahas N. 1989. The function of micF RNA. micF RNA
- 783 is a major factor in the thermal regulation of OmpF protein in *Escherichia coli*. *J Biol Chem*
- 784 264:17961-70.
- 785 13. Bojanovic K, D'Arrigo I, Long KS. 2017. Global Transcriptional Responses to Osmotic, Oxidative,
- 786 and Imipenem Stress Conditions in *Pseudomonas putida*. *Appl Environ Microbiol* 83:e03236-16.
- 787 14. Gomez-Lozano M, Marvig RL, Tulstrup MV, Molin S. 2014. Expression of antisense small RNAs
- 788 in response to stress in *Pseudomonas aeruginosa*. *BMC Genomics* 15:783.
- 789 15. Majdalani N, Chen S, Murrow J, St John K, Gottesman S. 2001. Regulation of RpoS by a novel
- 790 small RNA: the characterization of RprA. *Mol Microbiol* 39:1382-94.
- 791 16. Guillier M, Gottesman S. 2006. Remodelling of the *Escherichia coli* outer membrane by two small
- 792 regulatory RNAs. *Mol Microbiol* 59:231-47.
- 793 17. Chen S, Zhang A, Blyn LB, Storz G. 2004. MicC, a second small-RNA regulator of Omp protein
- 794 expression in *Escherichia coli*. *J Bacteriol* 186:6689-97.
- 795 18. Guillier M, Gottesman S. 2008. The 5' end of two redundant sRNAs is involved in the regulation
- 796 of multiple targets, including their own regulator. *Nucleic Acids Res* 36:6781-94.
- 797 19. Kim S, Jeon TJ, Oberai A, Yang D, Schmidt JJ, Bowie JU. 2005. Transmembrane glycine
- 798 zippers: physiological and pathological roles in membrane proteins. *Proc Natl Acad Sci U S A*
- 799 102:14278-83.
- 800 20. Foreman R, Fiebig A, Crosson S. 2012. The LovK-LovR two-component system is a regulator of
- 801 the general stress pathway in *Caulobacter crescentus*. *J Bacteriol* 194:3038-49.
- 802 21. Alvarez-Martinez CE, Lourenco RF, Baldini RL, Laub MT, Gomes SL. 2007. The ECF sigma
- 803 factor sigma(T) is involved in osmotic and oxidative stress responses in *Caulobacter crescentus*.
- 804 *Mol Microbiol* 66:1240-55.
- 805 22. Altschul SF, Gish W, Miller W, Myers EW, Lipman DJ. 1990. Basic local alignment search tool. *J*
- 806 *Mol Biol* 215:403-10.
- 807 23. Nielsen H. 2017. Predicting Secretory Proteins with SignalP. *Methods Mol Biol* 1611:59-73.
- 808 24. Mann M, Wright PR, Backofen R. 2017. IntaRNA 2.0: enhanced and customizable prediction of
- 809 RNA-RNA interactions. *Nucleic Acids Res* 45:W435-W439.
- 810 25. Zuker M. 2003. Mfold web server for nucleic acid folding and hybridization prediction. *Nucleic*
- 811 *Acids Res* 31:3406-15.
- 812

- 813 26. Mathews DH, Turner DH, Zuker M. 2007. RNA secondary structure prediction. *Curr Protoc*  
814 *Nucleic Acid Chem Chapter 11:Unit 11 2.*
- 815 27. Kempf B, Bremer E. 1998. Uptake and synthesis of compatible solutes as microbial stress  
816 responses to high-osmolality environments. *Arch Microbiol* 170:319-30.
- 817 28. Alon U. 2007. Network motifs: theory and experimental approaches. *Nat Rev Genet* 8:450-61.
- 818 29. Beisel CL, Storz G. 2011. The base-pairing RNA spot 42 participates in a multioutput feedforward  
819 loop to help enact catabolite repression in *Escherichia coli*. *Mol Cell* 41:286-97.
- 820 30. Papenfort K, Espinosa E, Casadesus J, Vogel J. 2015. Small RNA-based feedforward loop with  
821 AND-gate logic regulates extrachromosomal DNA transfer in *Salmonella*. *Proc Natl Acad Sci U S*  
822 *A* 112:E4772-81.
- 823 31. Plumbridge J, Bossi L, Oberto J, Wade JT, Figueroa-Bossi N. 2014. Interplay of transcriptional  
824 and small RNA-dependent control mechanisms regulates chitosugar uptake in *Escherichia coli*  
825 and *Salmonella*. *Mol Microbiol* 92:648-58.
- 826 32. Majdalani N, Gottesman S. 2005. The Rcs phosphorelay: a complex signal transduction system.  
827 *Annu Rev Microbiol* 59:379-405.
- 828 33. Cover TL, Blanke SR. 2005. *Helicobacter pylori* VacA, a paradigm for toxin multifunctionality. *Nat*  
829 *Rev Microbiol* 3:320-32.
- 830 34. Price MN, Wetmore KM, Waters RJ, Callaghan M, Ray J, Liu H, Kuehl JV, Melnyk RA, Lamson  
831 JS, Suh Y, Carlson HK, Esquivel Z, Sadeeshkumar H, Chakraborty R, Zane GM, Rubin BE, Wall  
832 JD, Visel A, Bristow J, Blow MJ, Arkin AP, Deutschbauer AM. 2018. Mutant phenotypes for  
833 thousands of bacterial genes of unknown function. *Nature* 557:503-509.
- 834 35. Biondi EG, Reisinger SJ, Skerker JM, Arif M, Perchuk BS, Ryan KR, Laub MT. 2006. Regulation  
835 of the bacterial cell cycle by an integrated genetic circuit. *Nature* 444:899-904.
- 836 36. Britos L, Abeliuk E, Taverner T, Lipton M, McAdams H, Shapiro L. 2011. Regulatory response to  
837 carbon starvation in *Caulobacter crescentus*. *PLoS One* 6:e18179.
- 838 37. Gogol EB, Rhodius VA, Papenfort K, Vogel J, Gross CA. 2011. Small RNAs endow a  
839 transcriptional activator with essential repressor functions for single-tier control of a global stress  
840 regulon. *Proc Natl Acad Sci U S A* 108:12875-80.
- 841 38. Poindexter JS. 1964. Biological Properties and Classification of the *Caulobacter* Group. *Bacteriol*  
842 *Rev* 28:231-95.
- 843 39. Ely B. 1991. Genetics of *Caulobacter crescentus*. *Methods Enzymol* 204:372-84.
- 844 40. Finan TM, Kunkel B, De Vos GF, Signer ER. 1986. Second symbiotic megaplasmid in *Rhizobium*  
845 *meliloti* carrying exopolysaccharide and thiamine synthesis genes. *J Bacteriol* 167:66-72.
- 846 41. Thanbichler M, Iniesta AA, Shapiro L. 2007. A comprehensive set of plasmids for vanillate- and  
847 xylose-inducible gene expression in *Caulobacter crescentus*. *Nucleic Acids Res* 35:e137.
- 848 42. Ried JL, Collmer A. 1987. An nptI-sacB-sacR cartridge for constructing directed, unmarked  
849 mutations in gram-negative bacteria by marker exchange- eviction mutagenesis. *Gene* 57:239-46.
- 850 43. West L, Yang D, Stephens C. 2002. Use of the *Caulobacter crescentus* genome sequence to  
851 develop a method for systematic genetic mapping. *J Bacteriol* 184:2155-66.
- 852 44. Santos PM, Di Bartolo I, Blatny JM, Zennaro E, Valla S. 2001. New broad-host-range promoter  
853 probe vectors based on the plasmid RK2 replicon. *FEMS Microbiol Lett* 195:91-6.
- 854 45. Marks ME, Castro-Rojas CM, Teiling C, Du L, Kapatral V, Walunas TL, Crosson S. 2010. The  
855 genetic basis of laboratory adaptation in *Caulobacter crescentus*. *J Bacteriol* 192:3678-88.
- 856 46. Truman AW, Kristjansdottir K, Wolfgeher D, Hasin N, Polier S, Zhang H, Perrett S, Prodromou C,  
857 Jones GW, Kron SJ. 2012. CDK-dependent Hsp70 Phosphorylation controls G1 cyclin  
858 abundance and cell-cycle progression. *Cell* 151:1308-18.
- 859 47. Cox J, Hein MY, Lubner CA, Paron I, Nagaraj N, Mann M. 2014. Accurate proteome-wide label-  
860 free quantification by delayed normalization and maximal peptide ratio extraction, termed  
861 MaxLFQ. *Mol Cell Proteomics* 13:2513-26.
- 862 48. Dam P, Oلمان V, Harris K, Su Z, Xu Y. 2007. Operon prediction using both genome-specific and  
863 general genomic information. *Nucleic Acids Res* 35:288-98.
- 864 49. Mao F, Dam P, Chou J, Oلمان V, Xu Y. 2009. DOOR: a database for prokaryotic operons.  
865 *Nucleic Acids Res* 37:D459-63.
- 866
